1                   **Copper Induces Zebrafish Central Neural System Myelin Defects: the**  
2                   **Regulatory Mechanisms in Wnt/Notch-*hoxb5b* Signaling and Underlying DNA**  
3                   **Methylation**

4                   Ting Zhang<sup>1</sup>, PengPeng Guan<sup>2</sup>, Guang Zhao<sup>1</sup>, YaPing Fang<sup>2</sup>,

5                   Hui Fu<sup>4</sup>, Jian-Fang Gui<sup>3</sup>, GuoLiang Li<sup>2,\*</sup>, Jing-Xia Liu<sup>1,\*</sup>

6                   1. College of Fisheries, Key Laboratory of Freshwater Animal Breeding, Ministry of Agriculture,  
7                   Huazhong Agricultural University, Wuhan, 430070, China

8  
9                   2. College of Informatics, Agricultural Bioinformatics Key Laboratory of Hubei Province, Hubei  
10                  Engineering Technology Research Center of Agricultural Big Data, Huazhong Agricultural University,  
11                  Wuhan, 430070, China

12  
13                  3. State Key Laboratory of Freshwater Ecology and Biotechnology, Institute of Hydrobiology, Chinese  
14                  Academy of Sciences, Wuhan, 430072, China

15  
16                  4. Department of Anatomy, school of basic medical science, Wuhan University, Wuhan, 430072, China

17

18                  **\*Address correspondence to:**

19                  Jing-Xia Liu, Ph.D., Huazhong Agricultural University, Wuhan, 430070, China

20                  Fax: 86-27-87282113; E-mail: [ichliu@mail.hzau.edu.cn](mailto:ichliu@mail.hzau.edu.cn)

21

22                  GuoLiang Li, Ph.D., Huazhong Agricultural University, Wuhan, 430070, China

23                  [guoliang.li@mail.hzau.edu.cn](mailto:guoliang.li@mail.hzau.edu.cn)

24

25

26

27

28                  **Running title:** Copper induces CNS myelin defects

## 29 **Abstract**

30 Unbalanced copper (Cu<sup>2+</sup>) homeostasis is associated with neurological development defects and  
31 diseases. However, the molecular mechanisms remain elusive. Here, central neural system (CNS) myelin  
32 defects and down-regulated expression of Wnt/Notch signaling and their down-stream mediator *hoxb5b*  
33 were observed in Cu<sup>2+</sup> stressed zebrafish larvae. Loss/knockdown-of-function of *hoxb5b* phenocopied  
34 the myelin and axon defects observed in Cu<sup>2+</sup> stressed embryos. Meanwhile, activation of Wnt/Notch  
35 signaling and ectopic expression of *hoxb5b* could rescue copper-induced myelin defects, suggesting  
36 Wnt&Notch-*hoxb5b* axis mediated Cu<sup>2+</sup> induced myelin and axon defects. Additionally, whole genome  
37 DNA methylation sequencing unveiled that a novel gene *fam168b*, similar to *pou3f1/2*, exhibited  
38 significant promoter hypermethylation and reduced expression in Cu<sup>2+</sup> stressed embryos. The  
39 hypermethylated locus in *fam168b* promoter acted pivotally in its transcription, and loss/knockdown of  
40 *fam168b/pou3f1* also induced myelin defects. Moreover, this study unveiled that *fam168b/pou3f1* and  
41 *hoxb5b* axis acted in a seesaw manner during fish embryogenesis, and demonstrated that copper induced  
42 the down-regulated expression of the Wnt&Notch-*hoxb5b* axis dependent of the function of copper  
43 transporter *cox17*, coupled with the promoter methylation of genes *fam168b/pou3f1* and their subsequent  
44 down-regulated expression dependent of the function of another transporter *atp7b*, making joint  
45 contributions to myelin defects in embryos. Those data will shed some light on the linkage of unbalanced  
46 copper homeostasis with specific gene promoter methylation and signaling transduction as well as the  
47 resultant neurological development defects and diseases.

48

## 49 **Author summary**

50 In this study, we first unveiled that copper induced central neural system (CNS) myelin defects *via*

51 down-regulating Wnt/Notch-*hoxb5b* signaling, and parallel with hypermethylating promoters of genes  
52 *fam168b/pou3f2* and their subsequent down-regulated expression. Additionally, we unveiled that  
53 *fam168b/pou3f1* and *hoxb5b* axis acted in a seesaw manner during fish embryogenesis. Genetically, we  
54 unveiled that copper was trafficked to mitochondrion *via cox17* then led to the down-regulation of  
55 Wnt&Notch-*hoxb5b* axis, and was trafficked to trans-Golgi network *via atp7b* to induce the  
56 hypermethylation and the down-regulated expression of *pou3f1/fam168b* genes, making joint  
57 contributions to myelin defects in embryos.

## 58 **Introduction**

59 Many neurological diseases with behavioral changes and neurological disorders are associated with  
60 the unbalanced copper homeostasis in human, such as Alzheimer's disease (AD), Wilson's disease (WD)  
61 and Wallerian degeneration (WD)(1, 2). Excess copper has been reported to damage nervous system and  
62 lead to the behavioral abnormalities in fish (3, 4). However, the detailed molecular characteristics and  
63 the potential mechanisms underlying copper-induced neural defects, especially axonal and myelin  
64 defects, remain unclear.

65 Axons transmit electrical impulses to neuron's targets, which is an essential process for the  
66 establishment of the nervous system. Axonal damage has been shown to cause neurological disorders,  
67 such as stroke, traumatic brain/spinal cord injuries, multiple sclerosis (MS) and Wallerian degeneration  
68 (WD) (5, 6). Myelin sheaths are essential for the rapid and efficient propagation of action potentials as  
69 well as for the support for the integrity of axons in the vertebrate nervous system. In the central nervous  
70 system (CNS), oligodendrocytes spirally wrap axons in multilamellar plasma membrane and eventually  
71 compact to form the myelin sheaths (7, 8). The compacted myelin sheaths increase the resistance of axons  
72 and reduce their capacitance by several orders of magnitude(8, 9). The failure of compacted myelin

73 formation leads to delayed or interrupted signal conduction, contributing to motor, sensory, and cognitive  
74 behavioral deficits(10, 11). Even a subtle defect of CNS myelin can cause a persistent cortical network  
75 dysfunction and induce neuropsychiatric disorders in mouse(12-14). Myelin disorder in human has been  
76 reported to associate with a series of neurodegenerative diseases such as MS, Menkes diseases (MD),  
77 Parkinson's diseases (PD) and Huntington's diseases (HD) (14, 15).

78 DNA methylation is implicated in many copper-induced disorders, including AD, WD, MS and MD  
79 (16, 17). In WD patients, accumulated copper dysregulates methylation status (17, 18). The methylation  
80 level of PAD2 is reduced in copper-accumulated MS brain, leading to changes of *mbp* expression (19,  
81 20). Copper has been reported to upregulate the expression of DNA methylation- and stress-related genes  
82 in zebrafish (21, 22). However, few reports are available about copper-induced locus-specific DNA  
83 methylation during embryogenesis, and few studies have linked this methylation with its induced myelin  
84 developmental damages in vertebrates.

85 The normal trafficking of the copper is essential for normal cellular functions. In vertebrate, copper  
86 is delivered to different organelle by independent copper chaperones, such as *cox17*, *atp7b*, and etc(23)..  
87 *Cox17* helps copper being delivered to mitochondrial cytochrome c oxidase, and Trans-Golgi network  
88 (TGN) resident *atp7b* helps copper being pumped to the circulation or to extracellular (24, 25).

89 In this study, zebrafish *in vivo* system was used to investigate the cellular and molecular mechanisms  
90 of copper-induced CNS myelin defects. Copper was revealed to induce myelin defects *via* down-  
91 regulating the expression of Wnt&Notch-*hoxb5b* axis. Additionally, the gene *fam168b*, similar to *pou3f1*  
92 and *pou3f2*, showed hypermethylation in the promoter regions and reduced expressions in copper  
93 stressed embryos, which might mediate in a parallel pathway to Wnt&Notch-*hoxb5b* in copper-induced  
94 myelin defects. Moreover, *cox17<sup>-/-</sup>* and *atp7b<sup>-/-</sup>* mutants were used to verify the correlation of copper

95 trafficking deficiency in specific organelle and the occurrence of developmental myelin defects in copper  
96 stressed embryos in this study.

## 97 **Results**

### 98 **Cu<sup>2+</sup> induces embryonic CNS myelin and axon defects in zebrafish.**

99 Transmission electron microscopy (TEM) detection revealed compacted myelin sheaths in the  
100 spinal cord in the control larvae at 5 dpf (Fig 1A1-A2), but significantly thinner (increased g-ratio) and  
101 uncompacted myelin in the spinal cord in Cu<sup>2+</sup> stressed larvae (Figs 1A3-A5). Additionally, WISH assays  
102 detected significantly reduced expression of *mbp*, *plp1a*, and *olig2* (Figs 1B, S1A, and S1B) in the spinal  
103 cord in Cu<sup>2+</sup> stressed embryos at 96 hpf. qRT-PCR results further conformed the reduced expression of  
104 *mbp* and *mpz* in the Cu<sup>2+</sup> stressed embryos at 96 hpf (Fig 1C). The Cu<sup>2+</sup> effects on myelin and axon  
105 development were further tested by analyzing the fluorescence in Cu<sup>2+</sup> stressed transgenic *Tg(mbp:EGFP)*  
106 and *Tg(olig2:dsRED)* embryos, with a significant down-regulation observed in their respective  
107 fluorescence at 96 and 48 hpf (Fig 1D). Furthermore, the length of axons was remarkably reduced in  
108 Cu<sup>2+</sup> stressed embryos (Fig 1E).

### 109 **CNS myelin and axon formation in *hoxb5b* loss- and gain-of-function embryos**

110 *Hoxb5b* exhibited significantly and specifically reduced expression in Cu<sup>2+</sup> stressed embryos (22),  
111 and was reported to function importantly in axon guidance in mouse(26). Thus, in this study, *hoxb5b* was  
112 assumed to be a potential mediator in Cu<sup>2+</sup> induced myelin and axon defects. To validate the hypothesis,  
113 an anti-sense morpholino (*hoxb5b*-MO) and a *hoxb5b* null mutant with a 4-bp deletion in the first exon  
114 (*hoxb5b*<sup>-/-</sup>) (Fig 2A) were applied to test the *hoxb5b* roles in Cu<sup>2+</sup> induced myelin and axon defects.  
115 Embryos injected with *hoxb5b*-MO at 48 hpf exhibited brain hypoplasia, eye hypoplasia, trunk  
116 abnormalities, and reduced body size (Fig 2B2), which phenocopied the defects observed in Cu<sup>2+</sup> stressed

117 embryos. However, *hoxb5b*<sup>-/-</sup> mutant embryos exhibited almost normal-like phenotype at 48 hpf (Figs  
118 2B3, B4).

119 Additionally, compared with the WT larvae, *hoxb5b* morphants or *hoxb5b*<sup>-/-</sup> mutants exhibited  
120 significantly decreased expression in the CNS myelin markers *mbp* and *plp1a* at 96 hpf (Figs 2C, 2D  
121 S2A1, and S2A2), identical to that in Cu<sup>2+</sup> stressed larvae. The *olig2* promoter driven fluoresce was  
122 observed to be significantly down-regulated in *hoxb5b*-MO injected *olig2*:dsRED transgenic embryos,  
123 compared with that in the control embryos at 48 hpf (Fig 2E). Furthermore, the length of each axon was  
124 significantly reduced in *hoxb5b* morphants (Fig 2E6), which also phenocopied the defects observed in  
125 Cu<sup>2+</sup> stressed embryos.

126 The expression of CNS myelin markers *mbp* and *plp1a* (Figs 2F, 2G and S2A3) and the *olig2*  
127 promoter driven fluoresce in CNS and the length of axon (Fig 2H) were partially rescued in Cu<sup>2+</sup> stressed  
128 embryos *via* ectopic expression of *hoxb5b*.

129 **Activation of Wnt or Notch signaling rescues myelin and axon defects in Cu<sup>2+</sup> stressed embryos *via***  
130 **recovering *hoxb5b* expression**

131 The microarray data showed that the expressions of Wnt and Notch signaling genes were reduced  
132 in Cu<sup>2+</sup> stressed embryos (Figs 3A, S2B1 and Table S9), and qRT-PCR assays confirmed the down-  
133 regulated expressions of Wnt signaling(27) and Notch signaling genes (Fig S2B2) in Cu<sup>2+</sup> stressed  
134 embryos. It has been reported that both Wnt and Notch signaling specified the oligodendrocyte fate (1,  
135 28-30), and *hoxb5b*, is downstream of these two signaling pathways(31, 32). In this study, both Wnt  
136 agonist BIO and NICD *notch3* mRNA partially rescued *hoxb5b* expression in Cu<sup>2+</sup> stressed embryos  
137 separately (Figs 3B, 3C). WISH and qRT-PCR analysis exhibited the expression of *mbp* and *plp1a* was  
138 recovered to nearly normal level in Cu<sup>2+</sup> stressed embryos co-exposed with BIO (Figs 3D, 3E).

139 Additionally, BIO significantly recovered the down-regulated fluorescence level and the length of the  
140 fluorescent axon to nearly normal level in Cu<sup>2+</sup> stressed *olig2:dsRED* transgenic embryos (Fig 3F).

141 WISH and qRT-PCR assays showed the expression of *mbp* and *plp1a* was significantly rescued via  
142 ectopic expression of NICD *notch3* mRNA in Cu<sup>2+</sup> stressed larvae (Figs 3G, 3H, and S2B3), and the  
143 fluorescence for the expression of *olig2* and the length of fluorescent axon was partially rescued in the  
144 Cu<sup>2+</sup> stressed *olig2:dsRED* transgenic embryos with ectopic expression of NICD mRNA (Fig 3I).

#### 145 **DNA methylation and transcriptional activity of myelin genes in Cu<sup>2+</sup> stressed embryos.**

146 Under stress conditions, epigenetic DNA methylation has been reported to function importantly in  
147 disease process and intergenerational inheritance (33, 34). Thus, the whole genome methylation level in  
148 Cu<sup>2+</sup> stressed larvae was examined to unveil the potential epigenetic mechanisms underlying Cu<sup>2+</sup>  
149 induced myelin and axon defects. It has been unveiled that Cu<sup>2+</sup> induced the expression of 26 hyper-  
150 methylated and 31 hypo-methylated genes in Cu<sup>2+</sup> stressed larvae(35). Among them, genes *pou3f1*,  
151 *pou3f2* and *fam168b*, which were associated with myelin and axon, were hypermethylated in the  
152 promoter domain (Figs 4A, S3A1 and S3B). Based on the microarray data reported previously(22), this  
153 study unveiled the down-regulated expression of genes *pou3f1*, *pou3f2*, and *fam168a*, the homolog gene  
154 of *fam168b* in Cu<sup>2+</sup> stressed embryos (Fig S3A2), which was further confirmed by qRT-PCR analysis  
155 (Fig 4B1). Specifically, *pou3f1* showed obviously decreased expression in the brain of Cu<sup>2+</sup> stressed  
156 larvae (Figs 4B2-B4 and S3A3). Additionally, the expression of *fam168b* was also significantly reduced  
157 in Cu<sup>2+</sup> stressed larvae from 24 hpf to 96 hpf (Figs 4B1 and C), and its promoter exhibited significant  
158 hypermethylation at 96 hpf (Figs 4D and S3C).

159 Loci in the *fam168b* promoter from -1672 to -1414, -1414 to -1240, and -1240 to -927 were  
160 obviously hypermethylated in Cu<sup>2+</sup> stressed larvae (Fig 4A). Thus, we further investigated the roles of

161 the aforementioned hypermethylated loci in regulating gene transcription. Different truncated promoter  
162 driven GFP fluoresces were almost distributed throughout the neural ectoderm in the injected embryos  
163 (Fig 4E), indicating their transcriptional activities during embryogenesis. Cu<sup>2+</sup> slightly down-regulated  
164 the GFP fluoresce driven by different truncated promoters in embryos (Figs 4E2, E4, E6, E8 and S3D).  
165 Additionally, compared to GFP fluoresce driven by *fam168b* promoter from -1672 in the injected  
166 embryos (Figs 4E1, E2 and S3D), the GFP fluoresce from -1414 was obviously reduced (Figs 4E3, E4  
167 and S3D), with a further reduction in the GFP fluoresce from -1240 (Figs 4E5, E6 and S3D) and -927  
168 (Figs 4E7, E8 and S3D) truncated promoter driven GFP plasmids. The luciferase activity assays revealed  
169 that the gradient truncation of the *fam168b* promoter led to a gradual decrease of the transcriptional  
170 activity in the sequence of -927 promoter mutant < -1240 mutant < -1414 mutant < -1672 (Figs 4G and  
171 S3D). The schema of truncated *fam168b* promoter constructs was shown in Fig 4F.

## 172 **CNS myelin formation in *fam168a/fam168b* loss- and gain-of-function embryos**

173 The function of *fam168a* and *fam168b* during embryogenesis was further tested by knockdown and  
174 knockout of *fam168a* and *fam168b* in embryos. The transcripts of *fam168a* and *fam168b* were distributed  
175 ubiquitously among the whole embryo at the early stages (Fig S4A and S4B). Their predominant  
176 expression in the brain was observed at 96 hpf (Figs 5A1 and A2), similar to the expression pattern of  
177 *pou3fl* in the embryos at this stage (Fig 5A3). The WT embryos injected with *fam168a* or *fam168b* MO  
178 exhibited similar developmental defects, such as shortened body, microcephalia, and slight ventralization  
179 at 24 hpf (Figs 5B2 and 5B3) and 96 hpf (Figs 5B6 and B7), similar to the developmental defects  
180 observed in *pou3fl* morphants (Fig 5B4 and B8). Meanwhile, *fam168a*<sup>-/-</sup> mutant with a 4-bp deletion  
181 (Fig S4C1) exhibited a normal-like phenotype (Fig 5B10) and *fam168b*<sup>-/-</sup> mutant with 1-bp deletion (Fig  
182 S4C2) displayed microcephalia and slight ventralization at 96 hpf (Fig 5B11).



183 Transcriptional profiles in *fam168a* and *fam168b* morphants were investigated by KEGG pathway  
184 (Figs 5C1, S4D1 and Table S10, S11) and cellular component GO analyses (Figs 5D1, S4E1 and Table  
185 S12, S13). They showed enrichment in the nervous system and synapse for the down-regulated DEGs,  
186 identical to transcriptional profiles in *pou3fl* morphants (Figs S4D2, S4E2, Table S14 and S15).  
187 Additionally, 85 genes in the nervous system (Fig 5C2) and 8 genes in synapse (Fig 5D2) were down-  
188 regulated and overlapped in the three *fam168a*, *fam168b*, and *pou3fl* morphants. Meanwhile, 104 genes  
189 in the nervous system (Fig S4D3) and 8 genes in synapse (Fig S4E3) were down-regulated and  
190 overlapped in both *fam168a* and *fam168b* morphants.

191 In this study, CNS myelin and axon development in *fam168a/b* loss/knockdown-of-function  
192 embryos were further tested in term of *mbp* and *plp1a* expression. *Mbp* and *plp1a* exhibited obviously  
193 reduced expression in both *fam168a/b* morphants and *fam168a* homozygous mutant by qRT-PCR and  
194 WISH assays (Figs 5E, 5F, S4F and S4G), similar to its expression in *pou3fl* morphants (Figs 5E and  
195 5F) and in Cu<sup>2+</sup> stressed embryos.

196 Additionally, *fam168a*, *fam168b*, and *pou3fl* mRNA were injected separately into Cu<sup>2+</sup> stressed  
197 embryos to test whether they could rescue the myelin formation. *Mbp* expression was partially recovered  
198 in the Cu<sup>2+</sup> stressed embryos injected separately with *fam168a*, *fam168b*, and *pou3fl* mRNA (Fig S4H).

### 199 **Wnt&Notch-*hoxb5b* signaling and *fam168a/fam168b/pou3fl* transcriptional factors in** 200 **embryogenesis**

201 The crosstalk between Wnt&Notch-*hoxb5b* and *fam168a/fam168b/pou3fl* transcriptional factors  
202 underlying Cu<sup>2+</sup>-induced myelin and axon developmental defects was explored separately by analysis of  
203 the expression of hypermethylated genes *pou3fl*, *fam168a*, and *fam168b* in *hoxb5b* morphants and  
204 *hoxb5b*<sup>-/-</sup> mutants and vice versa. *Pou3fl*, *fam168a*, and *fam168b* showed significantly increased

205 expression in both *hoxb5b* morphants and *hoxb5b*<sup>-/-</sup> mutants at 96 hpf (Figs 6A, 6B and S5A). So did  
206 *hoxb5b* in *pou3fl*, *fam168a*, and *fam168b* morphants (Figs 6C, 6D and S5B).

207 Furthermore, we detected the combined effects of down-regulation of the two signaling pathways  
208 on the embryonic development and *mbp* expression. Morphants injected with the combined MOs of  
209 *hoxb5b*, *pou3fl*, *fam168a* and *fam168b* exhibited similar phenotypic defects (Fig 6E) and obviously  
210 reduced expression of CNS myelin marker *mbp* (Figs 6F and S5C). Meanwhile, *hoxb5b*<sup>+/-</sup>*fam168a*<sup>+/-</sup>  
211 mutants exhibited normal-like phenotype at 96 hpf (Fig 6G), but an obviously reduced expression of  
212 CNS myelin marker *mbp* (Figs 6H and S5D).

### 213 **CNS myelin and axon formation in copper stressed *cox17*<sup>-/-</sup>, *atp7b*<sup>-/-</sup>, and *atp7a*<sup>-/-</sup> mutants**

214 The question of in which organelle Cu<sup>2+</sup> overload resulted in the changed expression of the down-  
215 stream signaling and the CNS myelin and axon defects was investigated by using *cox17*<sup>-/-</sup> (Fig 7A1) and  
216 *atp7b*<sup>-/-</sup> (Fig 7A2) null mutants. *Cox17*<sup>-/-</sup> and *atp7b*<sup>-/-</sup> null mutants exhibited normal-like phenotypes at 96  
217 hpf (Figs 7B). However, RNA-seq analysis revealed that genes in the nervous system (Fig S6A1),  
218 synapse (Fig S6A2), and axon (Fig S6A3) exhibited reduced expression in *cox17*<sup>-/-</sup> mutants.

219 Furthermore, the expression of the CNS myelin markers *mbp*, *plp1a* and genes *pou3fl*, and  
220 *fam168a* & *fam168b* was tested in *cox17*<sup>-/-</sup> or *atp7b*<sup>-/-</sup> mutants with and without Cu<sup>2+</sup> stimulation. When  
221 compared with the WT control, *mbp* and *plp1a* showed no expression change in *cox17*<sup>-/-</sup> mutants, and so  
222 did *fam168a* and *fam168b* in *cox17*<sup>-/-</sup> mutants, but *pou3fl* exhibited a slightly reduced expression in  
223 *cox17*<sup>-/-</sup> mutants (Figs 7C and S6B). When compared with their expression in *cox17*<sup>-/-</sup> mutants without  
224 copper stimulation (Figs 7C3, C7, C9, C10 and Figs S6B3, B7, B11 B13 and B14), *mbp*, *plp1a*, *pou3fl*,  
225 *fam168a*, and *fam168b* exhibited reduced expression in Cu<sup>2+</sup> stressed *cox17*<sup>-/-</sup> mutants at 96 hpf (Figs  
226 7C4, C8, C9, C10 and Figs S6B4, B8, B12, B13 and B14), similar to their expression tendency in Cu<sup>2+</sup>

227 stressed WT embryos (Figs 7C1,C2, C5, C6, C9, C10 and Figs S6B1,B2,B5, B6, B9,B10, B13 and B14).  
228 The percentages of embryos with reduced expression of the aforementioned genes were significantly  
229 increased in either WT or *cox17<sup>-/-</sup>* mutants after Cu<sup>2+</sup> stimulation (Fig S6C). Additionally, RT-PCR  
230 analysis also unveiled the significantly reduced expression of *mbp*, *plp1a* (Fig S6D1), *pou3fl*, *fam168a*,  
231 or *fam168b* (Fig S6D3) in either Cu<sup>2+</sup> stressed WT or *cox17<sup>-/-</sup>* embryos, but no significant change of  
232 *hoxb5b* in Cu<sup>2+</sup> stressed *cox17<sup>-/-</sup>* mutants (Fig S6D2).

233 Myelin specification was further tested in *atp7b<sup>-/-</sup>* embryos after copper stimulation. When  
234 compared with their expression in WT embryos, *mpb*, *plp1a*, *pou3fl*, *hoxb5b*, and *fam168a* exhibited  
235 significantly reduced expression in *atp7b<sup>-/-</sup>* embryos (Figs 7D, 7E, and Figs S6E-F), with the expression  
236 of *mbp* (Figs 7D4, D9, 7E1, and Fig S6F1), *plp1a* (Fig 7E1) and *hoxb5b* (Fig 7E2) being more  
237 significantly reduced in *atp7b<sup>-/-</sup>* embryos after copper stimulation. However, WISH and qRT-PCR assays  
238 revealed no significant expression change in *pou3fl* and *fam168a&fam168b* in *atp7b<sup>-/-</sup>* embryos after  
239 copper stimulation (Figs 7D8-D10, 7E3 and S6E, S6F2).

240 ER stress antagonist PBA was used to further study the role of copper-induced ER stresses in copper-  
241 induced down-regulated expression of *mbp*, *hoxb5b*, and *fam168a*. No significant recovery was observed  
242 in the expression of the three genes in Cu<sup>2+</sup> stressed embryos after PBA co-treatment (Fig S6G).

## 243 **Discussion**

244 Cu<sup>2+</sup> has been reported to induce dysfunctional locomotor in zebrafish larvae(22), but the underlying  
245 mechanisms are still poorly understood. In this study, Cu<sup>2+</sup> was revealed to induce uncompacted and  
246 thinner myelin in the spinal cord, which was consistent with the observations in *epb4112* mutants with  
247 dysfunctional locomotor behaviors(36).

248 It is reported that *mbp*, a widely used marker for myelin(37), expressed in both the CNS and PNS

249 myelin. *Olig2* expressed in oligodendrocyte and *olig2* driven fluoresce specifically labels  
250 oligodendrocytes and axon in the *olig2*:DsRed transgenic zebrafish line. In this study, *mbp* and *olig2*  
251 exhibited significantly reduced expression in the spinal cord, and the length of axon was significantly  
252 reduced in Cu<sup>2+</sup> stressed embryos, indicating Cu<sup>2+</sup> induced CNS myelin and axon defects in zebrafish.  
253 Additionally, the shortened axon might be the secondary damage of defective myelin formation in Cu<sup>2+</sup>  
254 stressed larvae, as indicated by previous studies showing that myelin abnormalities might precede  
255 evidence of axonopathies(38, 39).

256 Cu<sup>2+</sup> specifically induced the down-regulated expression of Wnt signaling and Notch signaling and  
257 their down-stream mediator *hoxb5b*, rather than other *hox* genes in zebrafish embryos(22). Inhibition of  
258 Wnt signaling has been shown to induce hypomyelination, whereas the activation of Wnt signaling  
259 significantly increased the transcription of myelin genes in mouse(29). Notch signaling has been revealed  
260 to regulate the differentiation of oligodendrocyte precursor cells, and influence oligodendrocyte  
261 maturation and myelin wrapping(30, 40), and *hox5* has been unveiled to regulate axon extension in motor  
262 neurons(26). Consistently, knockdown/out of *hoxb5b* zebrafish phenocopied the defective CNS myelin  
263 and axon observed in Cu<sup>2+</sup> stressed embryos, whereas ectopic *hoxb5b* expression rescued the defects of  
264 CNS myelin and axon, indicating Cu<sup>2+</sup> partially inhibited CNS myelin and axon marker expression *via*  
265 suppression of *hoxb5b*. The normal-like morphology of *hoxb5b*<sup>-/-</sup> mutant might result from the genetic  
266 compensation reported recently(41). Additionally, this study unveiled that both Wnt agonist BIO and  
267 Notch signaling activator NICD not only recovered the reduced expression of *hoxb5b*, but also recovered  
268 the myelin and axon defects in Cu<sup>2+</sup> stressed embryos, further demonstrating that down-regulated  
269 expression of Wnt&Notch-*hoxb5b* signaling mediated Cu<sup>2+</sup>-induced myelin and axon developmental  
270 defects.

271 DNA methylation has been suggested to involve in regulation of gene expression and associate with  
272 a series of copper induced demyelinating diseases such as WD and AD (16, 17). In this study, it was  
273 unveiled that *pou3f1*, *pou3f2* and *fam168b* exhibited down-regulated expression but hypermethylation  
274 separately in their promoter in Cu<sup>2+</sup> stressed embryos. Their promoter hypermethylation and reduced  
275 expression in Cu<sup>2+</sup> stressed embryos suggested the potential correlation of gene transcription with its  
276 promoter methylation in Cu<sup>2+</sup> stressed larvae.

277 In this study, it was shown that both *fam168b* and *fam168a* exhibited down-regulated expression in  
278 Cu<sup>2+</sup> stressed embryos, with a highly similar expression pattern to that of *pou3f1* during fish  
279 embryogenesis. Additionally, similar transcriptional profiles and gene expression patterns, such as  
280 enrichment of nervous system and synapse for the down-regulated DEGs as well as down-regulated  
281 expression of CNS myelin genes, were observed in both *fam168a* & *fam168b* loss/knockdown-of-function  
282 embryos and *pou3f1* morphants. *Pou3f1* and *pou3f2* were critical transcription factors in the conversion  
283 of embryonic stem cells into neuron and glial cells(42), and the function of *pou3f2* was largely overlapped  
284 with that of *pou3f1* in driving the transition from promyelinating to myelinating cells(43). *Fam168b*, a  
285 novel neural gene identified recently, has been reported to control neuronal survival and differentiation  
286 as well as be specifically expressed in myelinated neuron in the CNS in human and mice(44, 45), to  
287 exhibit significantly down-regulated expression in AD brains (44), but has never been reported to be  
288 involved in myelin development. In this study, similar transcriptional profiles were observed in *fam168a*,  
289 *fam168b*, and *pou3f1* morphants, and ectopic expression of *fam168a*, *fam168b*, or *pou3f1* could rescue  
290 CNS myelin defects in Cu<sup>2+</sup> stressed embryos. Taken together, *fam168a* and *fam168b* might be novel  
291 transcriptional factors similar to *pou3f1* in oligodendrocyte differentiation and the subsequent myelin  
292 cell development.

293 In this study, truncated promoter driven GFP and luciferase assays unveiled that the different  
294 hypermethylated loci in *fam168b* promoter, such as locus from -1672 to -1414, -1414 to -1240, and –  
295 1240 to – 927, were critical for its transcriptional regulation during embryogenesis and in cells. The  
296 deletion of the aforementioned loci in *fam168b* promoter could induce significant down-regulation of its  
297 transcriptional activity, suggesting the hypermethylated loci are required and pivotal for *fam168b*  
298 transcriptional activation. Collectively, we demonstrated for the first time that Cu<sup>2+</sup> might induce  
299 hypermethylation in the *fam168b* promoter, which is correlated with its down-regulated expression in  
300 Cu<sup>2+</sup> stressed embryos. However, the down-regulated expression of *fam168b* occurred at 24 hpf,  
301 followed by hypermethylation of its promoter at 96 hpf in copper stressed embryos, suggesting the  
302 chromatin structure of transcriptional complex with its binding chromosome DNA might be damaged  
303 before promoter hypermethylation. This is consistent with the point in recent reports showing that  
304 regional methylation could be a secondary consequence of changes in transcriptional complex and  
305 chromosome DNA structure(34, 46).

306 Additionally, up-regulated expression of epigenetic mediators *pou3f1/fam168a/fam168b* was  
307 observed in *hoxb5b* loss/knockdown embryos, but significantly increased expression of *hoxb5b* was  
308 observed in *pou3f1*, *fam168a*, or *fam168b* morphants, not only suggesting *pou3f1/fam168a/fam168b* and  
309 *hoxb5b* acted in embryogenesis in a seesaw manner, but also indicating that hypermethylated *pou3f1* and  
310 *fam168a&b* were parallel factors to Wnt/Notch-*hoxb5b* signaling axis in mediating copper-induced  
311 myelin and axon defects.

312 The transfer of copper to mitochondria was assumed to be blocked in copper stressed *cox17<sup>-/-</sup>* mutant,  
313 and *cox17<sup>-/-</sup>* embryos fail to produce ROS after copper stimulation (47), but defects of CNS myelin and  
314 axon were still observed in this study, suggesting that copper-induced myelin and axon defects might not

315 be essentially mediated by copper-induced ROS and by the function of *cox17* alone. Moreover, in this  
316 study, endoplasmic reticulum (ER) stress alleviant PBA was found unable to recover the expression of  
317 *mbp* in Cu<sup>2+</sup> stressed WT embryos, suggesting copper-induced ER stresses might not alone mediate  
318 copper-induced CNS myelin development defects.

319 The *cox17*<sup>-/-</sup> larvae exhibited significantly reduced expression in *pou3f1*, *fam168a*, or *fam168b* after  
320 copper stimulation, while Cu<sup>2+</sup> stressed *atp7b*<sup>-/-</sup> larvae exhibited slightly down-regulation in the  
321 expression of *pou3f1* but no expression change in *fam168a* and *fam168b*. However, *hoxb5b* exhibited  
322 significantly reduced expression in Cu<sup>2+</sup> stressed *atp7b*<sup>-/-</sup> mutants but not in Cu<sup>2+</sup> stressed *cox17*<sup>-/-</sup> mutants.  
323 This not only suggested that copper induced changes in the promoter chromatin structure and the down-  
324 regulated expression of the *fam168a/fam168b/pou3f* genes independent of the function of *cox17* alone,  
325 but also implying that copper required the integral function of *atp7b* rather than *cox17* to induce the  
326 promoter methylation and the resultant reduced expression of genes *pou3f1/fam168a/fam168b*, and  
327 required integral function of *cox17* rather than *atp7b* for the down-regulated expression of Wnt&Notch-  
328 *hoxb5b* axis. This might help to explain why myelin defects still occurred in either Cu<sup>2+</sup> stressed *cox17*<sup>-/-</sup>  
329 <sup>-/-</sup> or *atp7b*<sup>-/-</sup> embryos. In this study, we demonstrated that the epigenetic methylation of  
330 *pou3f1/fam168a/fam168b* in Cu<sup>2+</sup> stressed *cox17*<sup>-/-</sup> embryos or the down-regulated expression in the  
331 Wnt&Notch-*hoxb5b* axis in Cu<sup>2+</sup> stressed *atp7b*<sup>-/-</sup> embryos separately mediated the down-regulated  
332 expression of myelin genes in the Cu<sup>2+</sup> stressed mutants. It has been unveiled that copper could locate in  
333 cell nucleus and damage the chromatin structure directly (48, 49). Thus, this study provided the direct  
334 evidence for the first time that copper damages chromatin structure independent of ROS in DNA  
335 methylation during fish embryogenesis.

336 In summary, this study confirmed the structural and detailed molecular characters of CNS myelin

337 and axon defects occurring in copper stressed embryos. It was shown that copper induced ROS and led  
338 to down-regulation of Wnt&Notch-*hoxb5b* axis, with copper directly inducing locus-specific  
339 methylation and the down-regulated expression of *pou3f1/fam168a/fam168b* genes to mediate myelin  
340 and axon defects in copper stressed embryos. The working model is illustrated in Fig 8 for an intuitive  
341 understanding of how copper induces CNS defects. The combined data from the current study added  
342 novel insights into the mechanisms underlying the unbalanced copper homeostasis in cells linking with  
343 neurological disorders.

## 344 **Materials and methods**

### 345 **Ethics statement**

346 All experiments involving fish in this study were performed in accordance with  
347 the recommendations in the Guide for the care and use of Laboratory Animals of the Ministry of Science  
348 and Technology of China, which was approved by the Scientific Committee of Huazhong Agricultural  
349 University (permit number HZAUFI-2016-007).

### 350 **Fish stocks**

351 Wild-type zebrafish (*Danio rerio*) (AB) maintenance, breeding and staging were performed as  
352 described previously(50). *Tg(olig2:dsRED)* and *Tg(mbp:EGFP)* transgenic lines were obtained from  
353 China Zebrafish Resource Center (<http://www.zfish.cn/>), and the catalog numbers of the lines used were  
354 listed in Table S1.

### 355 **Morpholinos and Cas9/gRNA**

356 The CRISPR/Cas9 genome editing system was reported as an effective tool for gene editing in  
357 organisms (51, 52). In this study, the CRISPR/Cas9 system was used to construct *homeobox B5b*  
358 (*hoxb5b*), *family with sequence similarity 168 member A* (*fam168a*), *family with sequence similarity 168*



359 *member B (fam168b)*, *ATPase copper transporting alpha (atp7a)*, *ATPase copper transporting beta*  
360 *(atp7b)* and *cytochrome c oxidase copper chaperone COX17 (cox17)* mutants. The guide RNAs (gRNAs)  
361 were designed to target the first exon of aforementioned genes by ZiFiT Targeter Version 4.2 at the  
362 following URL (<http://zifit.partners.org/ZiFiT/CSquare9Nuclease.aspx>). Sequences of gRNAs are listed  
363 in Table S2. The morpholinos (MOs), including *hoxb5b*-MO, *pou3f1*-MO, *fam168a*-MO, and *fam168b*-  
364 MO, were purchased from Gene Tools, LLC (Philomath, Oregon, USA) and their sequences are listed in  
365 Table S3.

### 366 **Drug exposure**

367 Copper and 6-Bromoindirubin-3'-oxime (BIO) (Sigma-Aldrich, USA) were prepared as described  
368 previously (22, 27). Zebrafish embryos developed to sphere stage (4 hpf, hours post fertilization) or early  
369 were exposed to 3.9  $\mu$ M copper at random. BIO was added at bud stage. Embryos were harvested at  
370 indicated stages. Each group was biologically repeated 3 times.

### 371 **Transmission electron microscope (TEM) analysis**

372 TEM was performed to test CNS myelin structure in the control and copper stressed embryos at 5  
373 dpf (days post fertilization). A transmission electron microscope (Hitachi H-7650 TEM Japan) was used  
374 to acquire the images. G-ratio (axon diameter/myelinated fiber diameter) was calculated to assess myelin  
375 thickness. A lower g-ratio indicated a greater myelin thickness. The axon diameter and myelinated fiber  
376 diameter were measured using the image J software (NIH, Bethesda, Maryland).

### 377 **Plasmid construction**

378 The full-length *hoxb5b*, *fam168a*, *fam168b*, *POU class 3 homeobox 1 (pou3f1)*, and the intracellular  
379 domain of *notch receptor 3 (notch3)* (NICD) were amplified using the primers shown in Table S4 and  
380 cloned into pCS2 vector for synthesizing mRNAs. 5' unidirectional deleted mutants of *fam168b* promoter,

381 including -1672, -1414, -1240, -927, -623, and -284, were amplified using the primers shown in Table  
382 S5 and cloned separately into pCS2-GFP vector and pGL3 vector. All constructs were verified by  
383 sequencing.

#### 384 **mRNA Synthesis and Injection**

385 For mRNA preparation, capped mRNAs were synthesized using the mMessage mMachine kit  
386 (Ambion) according to the manufacturer's instructions. The synthesized mRNAs were diluted into  
387 different concentrations and injected into one-cell stage embryos as reported previously(53).

#### 388 **Quantitative RT-PCR analysis**

389 Zebrafish embryos were collected at indicated stages. Total RNA was isolated from 50 whole  
390 embryos/sample using Trizol reagent (Invitrogen). cDNA was synthesized using a M-MLV Reverse-  
391 Transcript Kit (Applied Biological Materials Inc, BC, Canada). qRT-PCR was performed as described  
392 previously(22, 53, 54). The sequences of the RT-PCR primers were listed in Table S6.

#### 393 **Whole-mount in situ hybridization**

394 Probes for zebrafish *myelin basic protein a (mbp)*, *oligodendrocyte lineage transcription factor 2*  
395 (*olig2*), *hoxb5b*, *pou3f1*, *fam168a*, and *fam168b* were amplified from cDNA pools using primers shown  
396 in Table S7. Whole-mount in situ hybridization (WISH) was performed as described previously(50, 53,  
397 55). WISH embryos were photographed with a Leica M205FA stereomicroscope. The signal area in each  
398 image was calculated by Image J software (NIH, Bethesda, Maryland). Embryos with changed  
399 expressions in the tested genes were identified and their percentage was calculated as reported in our  
400 previous works(22, 53, 56).

#### 401 **RNA-sequencing (RNA-Seq) and analysis**

402 WT embryos, WT embryos injected with a different MO of *hoxb5b*, *pou3f1*, *fam168a*, or *fam168b*,

403 *cox17<sup>-/-</sup>* and *atp7a<sup>-/-</sup>* mutants and Cu<sup>2+</sup> stressed *atp7a<sup>-/-</sup>* mutants at 96 hpf were lysed by Trizol reagent  
404 (Ambion, Life Technologies) for RNA preparation. The RNAs were then reversely transcribed, and  
405 amplified cDNA were sequenced on a BGISEQ-500 platform (BGI, Wuhan, China). Quantile  
406 normalization and subsequent data processing were performed using the RSEM v1.2.8 software package.  
407 Pathway and GO (Gene ontology) analyses were carried out to determine the roles of the differentially  
408 expressed genes (DEGs). The Hierarchical Cluster Tree (dendrogram) was constructed to show the  
409 relationships of expression levels among different samples.

#### 410 **Confocal microscopy**

411 Embryos were anesthetized with a low dose of tricaine and mounted on dishes with 1% low-melting  
412 agarose. Confocal images were captured by a Leica (Wetzlar, Germany) TCS SP8 confocal laser  
413 microscope. The fluorescence intensity of the positive cells in embryos was analyzed by software of  
414 Image J. Axon tracing and measurement was performed by using the Neuron J (Image J) software  
415 (National Institutes of Health, Bethesda, MD).

#### 416 **Bisulfite PCR validation**

417 Whole genome bisulfite sequencing (WGBS) has been performed in the control and the Cu<sup>2+</sup>  
418 stressed embryos at 96 hpf, and 57 differential methylated genes (DMGs) were unveiled (35). In this  
419 study, the regions for differentially methylated loci of the candidate genes such as *fam168b* between the  
420 control group and Cu<sup>2+</sup> stressed group were used for bisulfite PCR to validate the results of whole-  
421 genome bisulfite sequencing. The target fragments were amplified using specific primers (Table S8)  
422 designed with Methyl Primer Express v1.0 ([http://www.urogene.org/cgi-](http://www.urogene.org/cgi-bin/methprimer/methprimer.cgi)  
423 [bin/methprimer/methprimer.cgi](http://www.urogene.org/cgi-bin/methprimer/methprimer.cgi)). The obtained PCR products were purified using Min Elute Gel

424 Extraction kit (OMEGA) and cloned into the pMD19-T Vector (Takara). The positive clones were  
425 confirmed by PCR and 12 clones were sequenced for each subject.

#### 426 **Luciferase reporter assay**

427 Different truncated mutant promoters of *fam168b* were used for luciferase assays in this study. The  
428 luciferase reporter assays were performed as described previously (53). The data were reported as the  
429 mean  $\pm$  SD of three independent experiments in triplicate (53).

#### 430 **Statistical analyses**

431 The sample size used for different experiments in each group was larger than 10 embryos ( $n > 10$ ),  
432 and 2-3 biological replicates were performed for each test. Percentage analysis of the results among  
433 different groups was performed using hypergeometric distribution in the R-console software(57).  
434 Statistical data of the signal area and fluorescence level in different samples were analyzed using t-test  
435 by GraphPad Prism 7.00 software. Each dot represents signal level in an individual embryo. Statistical  
436 data of axon length were processed by GraphPad Prism 7.00 software. Each dot represents the length of  
437 each axon. The qRT-PCR data were analyzed by one-way analysis of variance (ANOVA) and post hoc  
438 Tukey's test in the Statistic Package for Social Science (SPSS) 19.0 software. Each dot represents one  
439 repeat. The statistical analysis for luciferase reporter assay results was performed using GraphPad Prism  
440 7.00 software (unpaired t-test) (GraphPad Software Inc). Data were presented as mean  $\pm$  SD,  $*P < 0.05$ ,  
441  $**P < 0.01$ ,  $***P < 0.001$ .

#### 442 **Supplementary Information**

443 Supplementary materials include 6 supplementary figures and figure legends, and 15 supplementary  
444 tables.

445 **Funding**

446 This work was supported by National Key R&D Program of China (2018YFD0900101), by the  
447 project 2662018JC024 of the Fundamental Research Funds for the Central University (to J-X. L.), and  
448 by the project of key laboratory of Biodiversity and Conservation of Aquatic Organisms (to J-X. L.), and  
449 by National Natural Science Foundation of China (Program No. 31771402 to GL. L.). The funders had  
450 no role in study design, data collection and analysis, decision to publish, or preparation of the manuscript.

451 **Acknowledgments**

452 We are grateful to Dr. Yibing Zhang (Institute of Hydrobiology, Chinese Academy of Science) for  
453 the gift of HEK293T cells. We thank Mr. Qinhan Xu, Bei Cui and Haojie Sun (Huazhong Agricultural  
454 University) for participating in the study.

455 **Author contributions**

456 J.X.L conceived the project and wrote the manuscript; T.Z performed most of the experiments,  
457 analyzed data and wrote the manuscript. P.P.G and G.Z contributed to analyzed data and experiments.  
458 G.L.L, Y.P.F, H.F and J.F.G supervised the project and approved the final manuscript.

459 **Conflict of Interest**

460 The authors declare no competing interests.

461 **References**

- 462 1. Villegas R, Martin SM, O'Donnell KC, Carrillo SA, Sagasti A, Allende ML. Dynamics of  
463 degeneration and regeneration in developing zebrafish peripheral axons reveals a requirement  
464 for extrinsic cell types. *Neural Dev.* 2012;7:19.
- 465 2. Brewer GJ. Copper toxicity in the general population. *Clin Neurophysiol.* 2010;121(4):459-60.
- 466 3. De Boeck G, van der Ven K, Hattink J, Blust R. Swimming performance and energy metabolism  
467 of rainbow trout, common carp and gibel carp respond differently to sublethal copper exposure.  
468 *Aquat Toxicol.* 2006;80(1):92-100.
- 469 4. Sandahl JF, Baldwin DH, Jenkins JJ, Scholz NL. Odor-evoked field potentials as indicators of

- 470 sublethal neurotoxicity in juvenile coho salmon (*Oncorhynchus kisutch*) exposed to copper,  
471 chlorpyrifos, or esfenvalerate. *Can J Fish Aquat Sci.* 2004;61(3):404-13.
- 472 5. Cheng MY, Ho HH, Huang TK, Chuang CF, Chen HY, Chung HW, et al. A compartmentalized  
473 culture device for studying the axons of CNS neurons. *Anal Biochem.* 2017;539:11-21.
- 474 6. Conforti L, Gilley J, Coleman MP. Wallerian degeneration: an emerging axon death pathway  
475 linking injury and disease. *Nat Rev Neurosci.* 2014;15(6):394-409.
- 476 7. Bauer NG, Richter-Landsberg C, Ffrench-Constant C. Role of the Oligodendroglial  
477 Cytoskeleton in Differentiation and Myelination. *Glia.* 2009;57(16):1691-705.
- 478 8. Simons M, Nave KA. Oligodendrocytes: Myelination and Axonal Support. *Cold Spring Harb*  
479 *Perspect Biol.* 2015;8(1):a020479.
- 480 9. Saab AS, Tzvetanova ID, Nave KA. The role of myelin and oligodendrocytes in axonal energy  
481 metabolism. *Curr Opin Neurobiol.* 2013;23(6):1065-72.
- 482 10. Gold BT, Johnson NF, Powell DK, Smith CD. White matter integrity and vulnerability to  
483 Alzheimer's disease: preliminary findings and future directions. *Biochim Biophys Acta.*  
484 2012;1822(3):416-22.
- 485 11. Takahashi N, Sakurai T, Davis KL, Buxbaum JD. Linking oligodendrocyte and myelin  
486 dysfunction to neurocircuitry abnormalities in schizophrenia. *Prog Neurobiol.* 2011;93(1):13-U7.
- 487 12. Liu J, Dietz K, DeLoyht JM, Pedre X, Kelkar D, Kaur J, et al. Impaired adult myelination in the  
488 prefrontal cortex of socially isolated mice. *Nat Neurosci.* 2012;15(12):1621-3.
- 489 13. Poggi G, Boretius S, Mobius W, Moschny N, Baudewig J, Ruhwedel T, et al. Cortical Network  
490 Dysfunction Caused by a Subtle Defect of Myelination. *Glia.* 2016;64(11):2025-40.
- 491 14. Saab AS, Nave KA. Myelin dynamics: protecting and shaping neuronal functions. *Curr Opin*  
492 *Neurobiol.* 2017;47:104-12.
- 493 15. Colman DR, Kreibich G, Frey AB, Sabatini DD. Synthesis and Incorporation of Myelin  
494 Polypeptides into Cns Myelin. *J Cell Biol.* 1982;95(2):598-608.
- 495 16. Ryu HW, Lee DH, Won HR, Kim KH, Seong YJ, Kwon SH. Influence of toxicologically relevant  
496 metals on human epigenetic regulation. *Toxicol Res.* 2015;31(1):1-9.
- 497 17. Medici V, Shibata NM, Kharbanda KK, LaSalle JM, Woods R, Liu S, et al. Wilson's disease:  
498 changes in methionine metabolism and inflammation affect global DNA methylation in early liver  
499 disease. *Hepatology.* 2013;57(2):555-65.
- 500 18. Mordaunt CE, Shibata NM, Kieffer DA, Czlonkowska A, Litwin T, Weiss KH, et al. Epigenetic  
501 changes of the thioredoxin system in the tx-j mouse model and in patients with Wilson disease.  
502 *Hum Mol Genet.* 2018;27(22):3854-69.
- 503 19. Mastronardi FG, Noor A, Wood DD, Paton T, Moscarello MA. Peptidyl argininedeiminase 2  
504 CpG island in multiple sclerosis white matter is hypomethylated. *J Neurosci Res.* 2007;85(9):2006-  
505 16.
- 506 20. Emery B, Lu QR. Transcriptional and Epigenetic Regulation of Oligodendrocyte Development  
507 and Myelination in the Central Nervous System. *Cold Spring Harb Perspect Biol.* 2015;7(9):a020461.
- 508 21. Dorts J, Falisse E, Schoofs E, Flamion E, Kestemont P, Silvestre F. DNA methyltransferases and  
509 stress-related genes expression in zebrafish larvae after exposure to heat and copper during  
510 reprogramming of DNA methylation. *Sci Rep.* 2016;6:34254.
- 511 22. Zhang T, Xu L, Wu JJ, Wang WM, Mei J, Ma XF, et al. Transcriptional Responses and  
512 Mechanisms of Copper-Induced Dysfunctional Locomotor Behavior in Zebrafish Embryos. *Toxicol*  
513 *Sci.* 2015;148(1):299-310.

- 514 23. Vonk WIM, Wijmenga C, van de Sluis B. Relevance of animal models for understanding  
515 mammalian copper homeostasis. *Am J Clin Nutr.* 2008;88(3):840s-5s.
- 516 24. Kaler SG. ATP7A-related copper transport diseases-emerging concepts and future trends.  
517 *Nat Rev Neurol.* 2011;7(1):15-29.
- 518 25. Schmidt K, Ralle M, Schaffer T, Jayakanthan S, Bari B, Muchenditsi A, et al. ATP7A and ATP7B  
519 copper transporters have distinct functions in the regulation of neuronal dopamine--hydroxylase.  
520 *J Biol Chem.* 2018;293(52):20085-98.
- 521 26. Philippidou P, Walsh CM, Aubin J, Jeannotte L, Dasen JS. Sustained Hox5 gene activity is  
522 required for respiratory motor neuron development. *Nat Neurosci.* 2012;15(12):1636-44.
- 523 27. Xu JP, Zhang RT, Zhang T, Zhao G, Huang Y, Wang HL, et al. Copper impairs zebrafish  
524 swimbladder development by down-regulating Wnt signaling. *Aquat Toxicol.* 2017;192:155-64.
- 525 28. Park HC, Appel B. Delta-Notch signaling regulates oligodendrocyte specification.  
526 *Development.* 2003;130(16):3747-55.
- 527 29. Tawk M, Makoukji J, Belle M, Fonte C, Trousson A, Hawkins T, et al. Wnt/beta-Catenin  
528 Signaling Is an Essential and Direct Driver of Myelin Gene Expression and Myelinogenesis. *J*  
529 *Neurosci.* 2011;31(10):3729-42.
- 530 30. Titus HE, Lopez-Juarez A, Silbak SH, Rizvi TA, Bogard M, Ratner N. Oligodendrocyte RasG12V  
531 expressed in its endogenous locus disrupts myelin structure through increased MAPK, nitric oxide,  
532 and notch signaling. *Glia.* 2017;65(12):1990-2002.
- 533 31. Hortopan GA, Baraban SC. Aberrant Expression of Genes Necessary for Neuronal  
534 Development and Notch Signaling in an Epileptic mind bomb Zebrafish. *Dev Dynam.*  
535 2011;240(8):1964-76.
- 536 32. Lengerke C, Schmitt S, Bowman TV, Jang IH, Maouche-Chretien L, McKinney-Freeman S, et  
537 al. BMP and Wnt specify hematopoietic fate by activation of the Cdx-Hox pathway. *Cell Stem Cell.*  
538 2008;2(1):72-82.
- 539 33. Medici V, Kieffer DA, Shibata NM, Chima H, Kim K, Canovas A, et al. Wilson Disease: Epigenetic  
540 effects of choline supplementation on phenotype and clinical course in a mouse model.  
541 *Epigenetics-U.S.* 2016;11(11):804-18.
- 542 34. Radford EJ, Ito M, Shi H, Corish JA, Yamazawa K, Isganaitis E, et al. In utero effects. In utero  
543 undernourishment perturbs the adult sperm methylome and intergenerational metabolism.  
544 *Science.* 2014;345(6198):1255903.
- 545 35. Tai Z, Guan P, Wang Z, Li L, Zhang T, Li G, et al. Common responses of fish embryos to metals:  
546 an integrated analysis of transcriptomes and methylomes in zebrafish embryos under the stress  
547 of copper ions or silver nanoparticles. *Metallomics.* 2019;11(9):1452-64.
- 548 36. Saitoh Y, Ohno N, Yamauchi J, Sakamoto T, Terada N. Deficiency of a membrane skeletal  
549 protein, 4.1G, results in myelin abnormalities in the peripheral nervous system. *Histochem Cell Biol.*  
550 2017;148(6):597-606.
- 551 37. Monk KR, Talbot WS. Genetic dissection of myelinated axons in zebrafish. *Curr Opin*  
552 *Neurobiol.* 2009;19(5):486-90.
- 553 38. Bartzokis G. Alzheimer's disease as homeostatic responses to age-related myelin breakdown.  
554 *Neurobiol Aging.* 2011;32(8):1341-71.
- 555 39. Desai MK, Sudol KL, Janelsins MC, Mastrangelo MA, Frazer ME, Bowers WJ. Triple-transgenic  
556 Alzheimer's disease mice exhibit region-specific abnormalities in brain myelination patterns prior  
557 to appearance of amyloid and tau pathology. *Glia.* 2009;57(1):54-65.



- 558 40. Rabadan MA, Cayuso J, Le Dreau G, Cruz C, Barzi M, Pons S, et al. Jagged2 controls the  
559 generation of motor neuron and oligodendrocyte progenitors in the ventral spinal cord. *Cell Death*  
560 *Differ.* 2012;19(2):209-19.
- 561 41. Ma ZP, Zhu PP, Shi H, Guo LW, Zhang QH, Chen YN, et al. PTC-bearing mRNA elicits a genetic  
562 compensation response via Upf3a and COMPASS components. *Nature.* 2019;568(7751):259-+.
- 563 42. Zhu Q, Song L, Peng G, Sun N, Chen J, Zhang T, et al. The transcription factor Pou3f1  
564 promotes neural fate commitment via activation of neural lineage genes and inhibition of external  
565 signaling pathways. *Elife.* 2014;3.
- 566 43. Lin YMJ, Hsin IL, Sun HS, Lin S, Lai YL, Chen HY, et al. NTF3 Is a Novel Target Gene of the  
567 Transcription Factor POU3F2 and Is Required for Neuronal Differentiation. *Mol Neurobiol.*  
568 2018;55(11):8403-13.
- 569 44. Mishra M, Akatsu H, Heese K. The novel protein MANI modulates neurogenesis and neurite-  
570 cone growth. *J Cell Mol Med.* 2011;15(8):1713-25.
- 571 45. Mishra M, Lee S, Lin MK, Yamashita T, Heese K. Characterizing the neurite outgrowth  
572 inhibitory effect of Mani. *Febs Lett.* 2012;586(19):3018-23.
- 573 46. Stadler MB, Murr R, Burger L, Ivanek R, Lienert F, Scholer A, et al. DNA-binding factors shape  
574 the mouse methylome at distal regulatory regions (vol 480, pg 490, 2011). *Nature.*  
575 2012;484(7395):550-.
- 576 47. Zhang YJ, Zhang RT, Sun HJ, Chen Q, Yu XD, Zhang T, et al. Copper inhibits hatching of fish  
577 embryos via inducing reactive oxygen species and down-regulating Wnt signaling. *Aquat Toxicol.*  
578 2018;205:156-64.
- 579 48. Cao H, Wang Y. Quantification of oxidative single-base and intrastrand cross-link lesions in  
580 unmethylated and CpG-methylated DNA induced by Fenton-type reagents. *Nucleic Acids Res.*  
581 2007;35(14):4833-44.
- 582 49. Goswami S, Sanyal S, Chakraborty P, Das C, Sarkar M. Interaction of a common painkiller  
583 piroxicam and copper-piroxicam with chromatin causes structural alterations accompanied by  
584 modulation at the epigenomic/genomic level. *Bba-Gen Subjects.* 2017;1861(8):2048-59.
- 585 50. Liu JX, Hu B, Wang Y, Gui JF, Xiao WH. Zebrafish eaf1 and eaf2/u19 Mediate Effective  
586 Convergence and Extension Movements through the Maintenance of wnt11 and wnt5 Expression.  
587 *J Biol Chem.* 2009;284(24):16679-92.
- 588 51. Rosenbluh J, Xu H, Harrington W, Gill S, Wang X, Vazquez F, et al. Complementary information  
589 derived from CRISPR Cas9 mediated gene deletion and suppression. *Nat Commun.* 2017;8:15403.
- 590 52. Varshney GK, Carrington B, Pei WH, Bishop K, Chen ZL, Fan CX, et al. A high-throughput  
591 functional genomics workflow based on CRISPR/Cas9-mediated targeted mutagenesis in  
592 zebrafish. *Nat Protoc.* 2016;11(12):2357-75.
- 593 53. Liu JX, Zhang D, Xie X, Ouyang G, Liu X, Sun Y, et al. Eaf1 and Eaf2 negatively regulate  
594 canonical Wnt/beta-catenin signaling. *Development.* 2013;140(5):1067-78.
- 595 54. Liu JX, Xu QH, Li S, Yu X, Liu W, Ouyang G, et al. Transcriptional factors Eaf1/2 inhibit  
596 endoderm and mesoderm formation via suppressing TGF-beta signaling. *Biochim Biophys Acta*  
597 *Gene Regul Mech.* 2017;1860(10):1103-16.
- 598 55. Cui B, Ren L, Xu QH, Yin LY, Zhou XY, Liu JX. Silver\_ nanoparticles inhibited erythrocyte  
599 during zebrafish embryogenesis. *Aquat Toxicol.* 2016;177:295-305.
- 600 56. Zhou XY, Zhang T, Ren L, Wu JJ, Wang WM, Liu JX. Copper elevated embryonic hemoglobin  
601 through reactive oxygen species during zebrafish erythrocyte. *Aquat Toxicol.* 2016;175:1-11.



602 57. Xu QH, Guan PP, Zhang T, Lu C, Li GL, Liu JX. Silver nanoparticles impair zebrafish skeletal  
603 and cardiac myofibrillogenesis and sarcomere formation. *Aquat Toxicol.* 2018;200:102-13.  
604

605 **Figure legends:**

606 **Fig 1. Central neural system (CNS) myelin and axon defects in Cu<sup>2+</sup> stressed zebrafish embryos.**  
607 (A) Transmission electron micrographs of transverse ventral spinal cord sections in the control or Cu<sup>2+</sup>  
608 stressed larvae at 5dpf (days post fertilization). Myelinated axons are pseudocolored in red (A1-A4).  
609 Scatter plots of the myelin g-ratios in the control or Cu<sup>2+</sup> stressed larvae (A5). (B) WISH analysis of  
610 CNS myelin marker *mbp* expression in the control or Cu<sup>2+</sup> stressed larvae at 96 hpf (hours post  
611 fertilization) (B1-B2), and quantification analysis of the WISH data in different samples (B3). (C) qRT-  
612 PCR analysis of the expression in CNS myelin markers *mbp* and *mpz* in the control or Cu<sup>2+</sup> stressed  
613 larvae at 96 hpf. (D) Confocal micrographs of 96-hpf *Tg(mbp:EGFP)* (D1-D2) and 48-hpf  
614 *Tg(olig2:dsRED)* (D3-D4) in the control or Cu<sup>2+</sup> stressed embryos, and quantification analysis of  
615 fluorescence level in different samples (D5-D6). (E) The length of axon in the control or Cu<sup>2+</sup> stressed  
616 embryos at 48 hpf. The axons were traced (E3-E4) and measured (E5) by Neuron J software. Each  
617 experiment was repeated three times, and a representative result is shown. Data are mean ± SD. B1-B2,  
618 D1-D4, E1-E2, lateral view, anterior to the left and dorsal to the up. The red arrow indicates *mbp*-  
619 expression in the spinal cord. \**P* < 0.05, \*\**P* < 0.01, \*\*\**P* < 0.001. Scale bars, 1 μm (A), 100 μm (B)  
620 and 50μm (E). See also Fig S1.

621 **Fig 2. CNS myelin and axon formation in *hoxb5b* loss- and gain-of-function embryos.** (A) Schematic  
622 diagram showing the genomic structure and a genetic mutation of zebrafish *hoxb5b* gene, with the red  
623 line indicating the genotypic deletion of the mutation used in this study. ATG denotes the translation start  
624 codon; TGA, the translation termination codon; PAM, the protospacer adjacent motif; slash, intron; blue  
625 horizontal bar, exon; dotted lines, the deletion of *hoxb5b*; numbers, the length of mutant base. (B)  
626 Phenotypes of WT embryos (B1), WT embryos injected with *hoxb5b*-MO (B2), or *hoxb5b*<sup>-/-</sup> mutant  
627 embryos (B3) at 48 hpf, and the percentage of embryos exhibiting abnormal development in different  
628 samples (B4). (C) WISH analysis of CNS myelin marker *mbp* (C1-C3) expression in WT embryos, WT  
629 embryos injected with *hoxb5b*-MO, or *hoxb5b*<sup>-/-</sup> mutant embryos at 96 hpf, and quantification analysis  
630 of the WISH data in different samples (C4). (D) qRT-PCR expression analysis of CNS myelin markers

631 *mbp* and *mpz* in WT embryos, WT embryos injected with *hoxb5b*-MO, or *hoxb5b*<sup>-/-</sup> mutants at 96 hpf.  
632 (E) Confocal micrographs of *Tg(olig2:dsRED)* in the control or *hoxb5b*-MO injected embryos at 48 hpf  
633 (E1-E2), and quantification analysis of fluorescence levels (E5) in different samples. Tracings (E3-E4)  
634 and length of axon (E6) in different samples. (F) WISH analysis of CNS myelin marker *mbp* expression  
635 in the control, Cu<sup>2+</sup> stressed, or Cu<sup>2+</sup> stressed embryos with ectopic *hoxb5b* expression at 96 hpf (F1-F3),  
636 and quantification analysis of the WISH data in different samples (F4). (G) qRT-PCR expression analysis  
637 of CNS myelin marker *mbp* in the control, Cu<sup>2+</sup> stressed, or Cu<sup>2+</sup> stressed embryos with ectopic *hoxb5b*  
638 expression at 96 hpf. (H) Confocal micrographs of *Tg(olig2:dsRED)* in the control, Cu<sup>2+</sup> stressed, or Cu<sup>2+</sup>  
639 stressed embryos with ectopic *hoxb5b* expression at 48 hpf (H1-H3). Quantification analysis of  
640 fluorescence levels in different samples (H7). Tracings (H4-H6) and length of axon (H8) in different  
641 samples. Each experiment was repeated three times, and a representative result is shown. Data are mean  
642 ± SD. B1-B3, C1-C3, E1-E2, F1-F3, H1-H3, lateral view, anterior to the left and dorsal to the up. The  
643 red arrow indicates *mbp*-expression in the spinal cord. \**P* < 0.05, \*\**P* < 0.01, \*\*\**P* < 0.001. NS, not  
644 significant. Scale bars, 200 μm (B), 100 μm (C, F) and 20 μm (E, H). See also Fig S2.

645 **Fig 3. Activation of Wnt or Notch signaling rescues myelin and axon defects in Cu<sup>2+</sup> stressed**  
646 **embryos via recovering *hoxb5b* expression.** (A) Enrichment of Wnt and Notch signaling pathways for  
647 down-regulated genes in 24 hpf Cu<sup>2+</sup> stressed embryos *via* KEGG pathway analysis. (B) WISH analysis  
648 of *hoxb5b* expression in the control, Cu<sup>2+</sup> exposed, or Cu<sup>2+</sup> and BIO co-exposed embryos at 24 hpf (B1-  
649 B3), and quantification analysis of the WISH data in different samples (B4). (C) WISH analysis of  
650 *hoxb5b* expression in the control, Cu<sup>2+</sup> exposed, or Cu<sup>2+</sup> and BIO co-exposed embryos with ectopic NICD  
651 expression at 24 hpf (C1-C3), and quantification analysis of the WISH data in different samples (C4).  
652 (D) WISH analysis of CNS myelin marker *mbp* expression in the control, Cu<sup>2+</sup> exposed, or Cu<sup>2+</sup> and BIO  
653 co-exposed embryos at 96 hpf (D1-D3). Quantification analysis of the WISH data in different samples  
654 (D4). (E) Confocal micrographs of *Tg(olig2:dsRED)* in the control, Cu<sup>2+</sup> exposed, or Cu<sup>2+</sup> and BIO co-  
655 exposed at 48 hpf (E1-E3). Quantification analysis of fluorescence levels (E7) in different samples.  
656 Tracings (E4-E6) and length of axon in different samples (E8). (F) WISH analysis of CNS myelin marker  
657 *mbp* expression in the control, Cu<sup>2+</sup> exposed, or Cu<sup>2+</sup> and BIO co-exposed embryos with NICD ectopic  
658 expression at 96 hpf (F1-F3). Quantification analysis of the WISH data in different samples (F4). (G)  
659 Confocal micrographs of *Tg(olig2:dsRED)* in the control, Cu<sup>2+</sup> exposed or Cu<sup>2+</sup> and BIO co-exposed

660 embryos with ectopic NICD expression at 48 hpf (**G1-G3**). Quantification analysis of fluorescence levels  
661 in different samples (**G7**). Tracings (**G4-G6**) and length of axon in different samples (**G8**). Each  
662 experiment was repeated three times, and a representative result is shown. Data are mean  $\pm$  SD. **B1-B3**,  
663 **C1-C3**, dorsal view, anterior to the top, **D1-D3**, **E1-E3**, **F1-F3**, **G1-G3**, lateral view, anterior to the left  
664 and dorsal to the up. The red arrow indicates mbp-expression in the spinal cord. \* $P < 0.05$ , \*\* $P < 0.01$ ,  
665 \*\*\* $P < 0.001$ . NS, not significant. Scale bars, 200  $\mu\text{m}$  (B,C), 100  $\mu\text{m}$  (D, F) and 20  $\mu\text{m}$  (E, G). See also  
666 Fig S2.

667 **Fig 4. DNA methylation and transcriptional activity of gene *fam168b* in  $\text{Cu}^{2+}$  stressed embryos.**

668 (A) Graphical representation of methylation patterns in the promoter domain of *fam168b* gene in the  
669 control or  $\text{Cu}^{2+}$  stressed larvae at 96 hpf. (B) qRT-PCR analysis of *pou3fl*, *fam168a*, and *fam168b*  
670 expression in the control or  $\text{Cu}^{2+}$  stressed embryos (**B1**). WISH analysis of expression for the myelination  
671 transcriptional factor *pou3fl* in the control or  $\text{Cu}^{2+}$  stressed larvae at 96 hpf (**B2-B3**), and quantification  
672 analysis of the WISH data in different samples (**B4**). (C) qRT-PCR analysis of *fam168b* expression in  
673  $\text{Cu}^{2+}$  stressed embryos at different developmental stages. (D) Bisulfite PCR sequencing analysis of  
674 *fam168b* methylation in  $\text{Cu}^{2+}$  stressed embryos at different stages. (E) Representative embryos injected  
675 with different 5' unidirectional deletions of *fam168b* promoter driven GFP plasmid at 24 hpf. A series of  
676 plasmids containing 5' unidirectional deletions of *fam168b* promoter region (-1672, -1414, -1240 and -  
677 927) were injected separately into zebrafish embryos at one-cell stage, and embryos at 24 hpf were  
678 observed *via* confocal microscope. (F) The schematic of truncated *fam168b* promoter mutants. (G) The  
679 luciferase activities of different truncated *fam168b* promoters in HEK293 cells. Each experiment was  
680 repeated three times, and a representative result is shown. Data are mean  $\pm$  SD. **B2-B3**, **E1-E8**, lateral  
681 view, anterior to the left and dorsal to the up. \* $P < 0.05$ , \*\* $P < 0.01$ , \*\*\* $P < 0.001$ . NS, not significant.  
682 Scale bars, 100  $\mu\text{m}$ . See also Fig S3.

683 **Fig 5. Myelin and axon formation in *fam168a/fam168b* loss- and gain-of-function embryos.**

684 (A) Expression and distribution of *fam168a* and *fam168b* in WT embryos at 96 hpf, which exhibited  
685 similar expression pattern to that of myelination transcriptional factor *pou3fl* in embryos. (B) Phenotypes  
686 of WT embryos, *fam168a*, *fam168b* and *pou3fl* morphants or mutants at 24 hpf and 96 hpf. (C)  
687 Enrichment of genes exhibiting down-regulated expression in *fam168b* morphants at 96 hpf *via* KEGG  
688 pathway analysis (**C1**) and venn diagrams representing the overlapping down-regulated nervous system

689 genes in *pou3fl*, *fam168b* and *fam168a* morphants at 96 hpf (C2). (D) Gene ontology (GO) classification  
690 of the genes exhibiting down-regulated expression in *fam168b* morphants at 96 hpf (D1) and venn  
691 diagrams representing the overlapping down-regulated synapse genes in *pou3fl*, *fam168b* and *fam168a*  
692 morphants at 96 hpf (D2). (E) WISH analysis of CNS myelin marker *mbp* in WT embryos, *fam168b*,  
693 *fam168a* and *pou3fl* morphants or mutants at 96 hpf (E1-E6), and quantification analysis of the WISH  
694 data in different samples (E7-E8). (F) qRT-PCR expression analysis of CNS myelin marker **mbp** in  
695 embryos injected with different morpholinos at 96 hpf. Each experiment was repeated three times, and a  
696 representative result is shown. Data are mean  $\pm$  SD. A, B, E, lateral view, anterior to the left and dorsal  
697 to the up. The red arrow indicates *mbp*-expression in the spinal cord. \* $P < 0.05$ , \*\* $P < 0.01$ , \*\*\* $P <$   
698 0.001. NS, not significant. Scale bars, 200  $\mu\text{m}$  (A, B) and 100  $\mu\text{m}$  (E). See also Fig S4.

699 **Fig 6. Wnt&Notch-*hoxb5b* signaling axis and *fam168a/fam168b/pou3fl* transcriptional factors in**  
700 **embryogenesis.**

701 (A) WISH analysis of hypermethylated genes *pou3fl*, *fam168a* and *fam168b* expression in the control or  
702  $\text{Cu}^{2+}$  stressed larvae at 96 hpf in *hoxb5b*-MO injected- or *hoxb5b*<sup>-/-</sup> embryos (A1-A9). Quantification  
703 analysis of the WISH data in different samples (A10). (B) qRT-PCR analysis of *pou3fl*, *fam168a* and  
704 *fam168b* expression in *hoxb5b*-MO injected embryos at 96 hpf. (C) WISH analysis of *hoxb5b* expression  
705 in *pou3fl*, *fam168a* or *fam168b* morphants at 24 hpf. Quantification analysis of the WISH data in  
706 different samples (C5). (D) qRT-PCR expression analysis of *hoxb5b* in *pou3fl*, *fam168a* or *fam168b*  
707 morphants at 24 hpf. (E) Phenotypes of embryos injected separately with *hoxb5b*, *pou3fl*, *fam168a* and  
708 *fam168b* MOs at 96 hpf, and the percentage of embryos exhibiting abnormal development in different  
709 samples (E3). (F) WISH analysis of CNS myelin marker *mbp* expression in the control,  $\text{Cu}^{2+}$  stressed or  
710 MOs injected embryos at 96 hpf. Quantification analysis of the WISH data in different samples (F4). (G)  
711 Phenotypes of *hoxb5b*<sup>-/-</sup>/*fam168a*<sup>-/-</sup> embryos at 96 hpf. (H) WISH analysis of CNS myelin marker *mbp*  
712 expression in the control,  $\text{Cu}^{2+}$  stressed or *hoxb5b*<sup>-/-</sup>/*fam168a*<sup>-/-</sup> embryos at 96 hpf. Quantification analysis  
713 of the WISH data in different samples (H4). Each experiment was repeated three times, and a  
714 representative result is shown. Data are mean  $\pm$  SD. C, dorsal view, anterior to the top, A, E, F, G, H,  
715 lateral view, anterior to the left and dorsal to the up. The red arrow indicates *mbp*-expression in the spinal  
716 cord. \* $P < 0.05$ , \*\* $P < 0.01$ , \*\*\* $P < 0.001$ . NS, not significant. Scale bars, 100  $\mu\text{m}$  (A, C, F, H) and 100  
717  $\mu\text{m}$  (E, G). See also Fig S5.

718 **Fig 7. Myelin and axon formation in Cu<sup>2+</sup> stressed *cox17* and *atp7b* mutant.**

719 (A) Schematic diagrams showing the genomic structure and genetic mutations of zebrafish genes *cox17*  
720 and *atp7b*, and the red line in gene *cox17* or *atp7b* respectively indicates the genotypic deletion of the  
721 mutation of *cox17* or *atp7a* used in this study. ATG denotes the translation start codon; TGA, the  
722 translation termination codon; PAM, the protospacer adjacent motif; slash, intron; blue horizontal bar,  
723 exon; dotted lines, the deletion of *cox17* and *atp7b*; numbers, the length of mutant base. (B) Phenotypes  
724 of *cox17* (B2) mutant with a 4-bp deletion and *atp7b* (B3) mutant with a 5-bp deletion at 96 hpf. (C)  
725 WISH analysis of the expression of CNS myelin marker *mbp* (C1-C4) and myelination transcriptional  
726 factor *pou3f1* (C5-C8) in WT embryos, Cu<sup>2+</sup> stressed WT embryos, *cox17*<sup>-/-</sup> mutant embryos or Cu<sup>2+</sup>  
727 stressed *cox17*<sup>-/-</sup> mutant at 96 hpf. Quantification analysis of the WISH data in different samples (C9-  
728 C10). (D) WISH analysis of the expression of CNS myelin marker *mbp* (D1-D4) and myelination  
729 transcriptional factor *pou3f1* (D5-D8) in WT embryos, Cu<sup>2+</sup> stressed WT embryos, *atp7b*<sup>-/-</sup> mutant  
730 embryos or Cu<sup>2+</sup> stressed *atp7b*<sup>-/-</sup> mutant at 96 hpf. Quantification analysis of the WISH data in different  
731 samples (D9-D10). (E) qRT-PCR expression analysis of the CNS myelin marker *mbp* (E1),  
732 transcriptional factor *hoxb5b* (E2), myelination transcriptional factor *pou3f1*, *fam168a* and *fam168b* (E3)  
733 in WT embryos, Cu<sup>2+</sup> stressed WT embryos, *atp7b*<sup>-/-</sup> mutants or Cu<sup>2+</sup> stressed *atp7b*<sup>-/-</sup> mutants at 96 hpf.  
734 Each experiment was repeated three times, and a representative result is shown. Data are mean ± SD. B,  
735 C, D, lateral view, anterior to the left and dorsal to the up. The red arrow indicates *mbp*-expression in the  
736 spinal cord. \**P* < 0.05, \*\**P* < 0.01, \*\*\**P* < 0.001. NS, not significant. Scale bars, 200 μm (A) and 100  
737 μm (C, D). See also Fig S6.

738 **Fig 8. Working model of copper in inducing CNS defects.**

739 Cu<sup>2+</sup> overloaded in the CNS cells of Cu<sup>2+</sup> stressed WT, *cox17*, or *atp7b* null larvae, leading to the down-  
740 regulation of the Wnt/Notch-*hoxb5b* signaling axis in *atp7b* null larvae, the promoter methylation of  
741 genes *pou3f1/pou3f2/fam168b* and their down-regulated expression in *cox17* null mutants, and leading  
742 to the down-regulated expression of the two signaling pathways in WT embryos, then, resulted in CNS  
743 defects in copper stressed WT, *cox17*<sup>-/-</sup>, or *atp7b*<sup>-/-</sup> larvae respectively.

744 **Supporting Information Legends**

745 **Fig S1. Expression of central neural system (CNS) myelin genes in Cu<sup>2+</sup> stressed embryos. Related**

746 **to Fig 1.**

747 **(A)** WISH analysis of expression for myelin oligodendrocyte marker *olig2* at 48hpf **(A1-A2)** in the  
748 control or Cu<sup>2+</sup> stressed embryos, and the quantification analysis of the WISH data in different samples  
749 **(A3)**. **(B)** The percentage of embryos exhibited reduced expression of indicated CNS myelin genes in  
750 different samples. Each experiment was repeated three times, and a representative result is shown. Data  
751 are mean ± SD. **A1-A2**, lateral view, anterior to the left and dorsal to the up. The red arrow indicates  
752 *olig2*-expressing in oligodendrocyte. \**P* < 0.05, \*\**P* < 0.01, \*\*\**P* < 0.001. NS, not significant. Scale  
753 bars, 100 μm.

754 **Fig S2 Cu<sup>2+</sup> induces CNS myelin and axon defects by down-regulating Wnt & Notch - *hoxb5b***  
755 **regulatory axis in zebrafish embryos. Related to Fig 2 and 3.**

756 **(A)** The percentage of embryos exhibited reduced expression of indicated CNS myelin genes in WT  
757 embryos, *hoxb5b* Morphants, or *hoxb5b*<sup>-/-</sup> mutants at 96hpf**(A1-A2)**. **(A3)** The percentage of embryos  
758 exhibited reduced expression of *mbp* in the control, Cu<sup>2+</sup> stressed embryos, or Cu<sup>2+</sup> stressed embryos with  
759 ectopic *hoxb5b* expression at 96hpf. **(B)** Clustering analysis of Notch signaling genes with reduced  
760 expression in Cu<sup>2+</sup> stressed embryos at 24 hpf**(B1)**. qRT-PCR analysis of Notch signaling genes *notch1a*,  
761 *dlc* and *mib* expression in the control or Cu<sup>2+</sup> stressed embryos at 24gpf **(B2)**. The percentage of  
762 embryos exhibiting reduced expression of *mbp* in the control, Cu<sup>2+</sup> exposed, or Cu<sup>2+</sup> and BIO co-exposed  
763 embryos with NICD ectopic expression at 96 hpf**(B3)**. Each experiment was repeated three times, and a  
764 representative result is shown. Data are mean ± SD. \**P* < 0.05, \*\**P* < 0.01, \*\*\**P* < 0.001. NS, not  
765 significant.

766 **Fig S3 DNA methylation and transcriptional activity of myelin genes in Cu<sup>2+</sup> stressed embryos.**

767 **Related to Fig 4.**

768 (A) Analysis of bisulfite sequencing data for *fam168b*, *pou3f1* and *pou3f2* methylation levels in the  
769 control or Cu<sup>2+</sup> stressed embryos(A1). RNA-seq analysis of *fam168a*, *pou3f1* and *pou3f2b* expression in  
770 the control or Cu<sup>2+</sup> stressed embryos(A2).The percentage of embryos exhibited reduced expression of  
771 *pou3f1* in the control or Cu<sup>2+</sup> stressed embryos at 96hpf(A3).(B) Graphical representation of methylation  
772 patterns in the promoter domain of genes *pou3f1* (B1) and *pou3f2* (B2) separately in the control or Cu<sup>2+</sup>  
773 stressed embryos. (C) Bisulfite PCR validation of *fam168b* in the control or Cu<sup>2+</sup> stressed embryos. (D)  
774 Quantification of fluorescence level in 24hpf WT embryos injected separately with plasmid containing  
775 different truncated *fam168b* promoter driven GFP reporters. Each experiment was repeated three times,  
776 and a representative result is shown. Data are mean ± SD. \*P < 0.05, \*\*P < 0.01, \*\*\*P < 0.001. NS, not  
777 significant.

778 **Fig S4 Myelin and axon formation in *fam168a/fam168b* loss- and gain-of-function embryos**

779 **Related to Fig 5.**

780 (A) The expression pattern of zebrafish *fam168a* during embryogenesis. (B) The expression pattern of  
781 zebrafish *fam168b* during embryogenesis. (C) Schematic diagram showing the genomic structure and a  
782 genetic mutation of *fam168a* (C1) and *fam168b* (C2) used in this study. ATG denotes the translation start  
783 codon; TGA denotes the translation terminate codon; PAM denotes the protospacer adjacent motif; slash  
784 denotes intron; blue horizontal bar denotes exon; dotted lines denote deletion of *fam168a* and *fam168b*;  
785 Numbers denote the length of mutant base. (D) Enrichment of genes exhibited down-regulated  
786 expression in *fam168a* or *pou3f1* morphants at 96hpf via KEGG pathway analysis (D1-D2) and venn  
787 diagrams representing the overlapping down-regulated nervous system genes in *fam168a* and *fam168b*  
788 morphants at 96 hpf (D3). (E) Gene ontology (GO) classification of the genes exhibited down-regulated  
789 expression in *fam168a*(E2) or *pou3f1* morphants at 96hpf (E2) and venn diagrams representing the



790 overlapping down-regulated synapse genes in *fam168a* and *fam168b* morphants at 96 hpf (**E3**). (**F**) WISH  
791 analysis of expression for CNS myelin marker *plp1a* at 96hpf in the WT, *fam168a*<sup>-/-</sup> or *fam168b*<sup>-/-</sup>  
792 embryos (**F1-F3**), and the quantification analysis of the WISH data in different samples (**F4**). (**G**) The  
793 percentage of embryos exhibiting reduced expression in different samples. (**H**) WISH analysis of CNS  
794 myelin marker *mbp* expression in the control, Cu<sup>2+</sup> stressed embryos, or Cu<sup>2+</sup> stressed embryos with  
795 ectopic different mRNA expression(**H1-H5**). (**H6**) Quantification analysis of the WISH data in different  
796 samples. (**H7**) Percentage of embryos exhibited reduced expression of *mbp* in different samples. Each  
797 experiment was repeated three times, and a representative result is shown. Data are mean ± SD. **A1-A6**,  
798 **B1-B6**, dorsal view, anterior to the top, **A7-A8**, **B7-B8**, **F1-3**, **H** lateral view, anterior to the left and  
799 dorsal to the up. \*P < 0.05, \*\*P < 0.01, \*\*\*P < 0.001. NS, not significant. Scale bars, 100 μm.

800 **Fig S5 percentage of embryos exhibited abnormal expression in different samples. Related to Fig**  
801 **6.**

802 **Fig S6 RNA-seq,WISH and qRT-PCR analysis unveils differentially expressed nervous system**  
803 **genes in *cox17* and *atp7b* mutant embryos. Related to Fig 7.**

804 (**A**) Clustering analysis of endoplasmic reticulum genes exhibited down-regulated expression in *atp7a*<sup>-/-</sup>  
805 mutant embryos at 96 hpf(**A1**). Clustering analysis of the expression of endoplasmic reticulum stress  
806 genes in WT embryos, Cu<sup>2+</sup> stressed WT embryos, *atp7a*<sup>-/-</sup> mutants, or Cu<sup>2+</sup> stressed *atp7a*<sup>-/-</sup> mutants at  
807 96hpf (**A2**). Clustering analysis of myelin genes in WT embryos, Cu<sup>2+</sup> stressed WT embryos, *atp7a*<sup>-/-</sup>  
808 mutants, or Cu<sup>2+</sup> stressed *atp7a*<sup>-/-</sup> mutants at 96hpf (**A3**). (**B**) WISH analysis of the myelin genes *plp1a*,  
809 *fam168a* and *fam168b* expression in WT embryos, Cu<sup>2+</sup> stressed WT embryos, *cox17*<sup>-/-</sup> mutant embryos  
810 or Cu<sup>2+</sup> stressed *cox17*<sup>-/-</sup> mutant at 96hpf (**B1-B12**). Quantification analysis of the WISH data in different  
811 samples (**B13-B14**). (**C**) Percentage of embryos exhibited reduced expression in different samples. (**D**)



812 qRT-PCR analysis of CNS myelin markers *mbp*, *plp1a*(**D1**), transcriptional factor *hoxb5b*(**D2**), *pou3f*,  
813 *fam168a* and *fam168b*(**D3**) expression in WT embryos, Cu<sup>2+</sup> stressed WT embryos, *cox17<sup>-/-</sup>* mutant  
814 embryos or Cu<sup>2+</sup> stressed *cox17<sup>-/-</sup>* mutant at 96hpf. (**E**) WISH analysis of myelination transcriptional  
815 factors *fam168a* and *fam168b* in WT embryos, Cu<sup>2+</sup> stressed WT embryos, *atp7b<sup>-/-</sup>* mutant embryos or  
816 Cu<sup>2+</sup> stressed *atp7b<sup>-/-</sup>* mutant at 96hpf (**E1-E8**). Quantification analysis of the WISH data in different  
817 samples (**E9**). (**F**) Percentage of embryos exhibited reduced expression in different samples. (**H**) qRT-  
818 PCR analysis of *mbp* (**H1**), *hoxb5b* (**H1**) and *fam168a* (**H3**) in WT embryos, Cu<sup>2+</sup> stressed, and Cu<sup>2+</sup> and  
819 PBA co-exposed embryos at 96hpf. Each experiment was repeated three times, and a representative result  
820 is shown. Data are mean ± SD. **B1-A16**, **F1-F8**, lateral view, anterior to the left and dorsal to the up. The  
821 red arrow indicates *mbp*-expressing in the spinal cord. \*P < 0.05, \*\*P < 0.01, \*\*\*P < 0.001. NS, not  
822 significant. Scale bars, 100 μm.

823

824

825

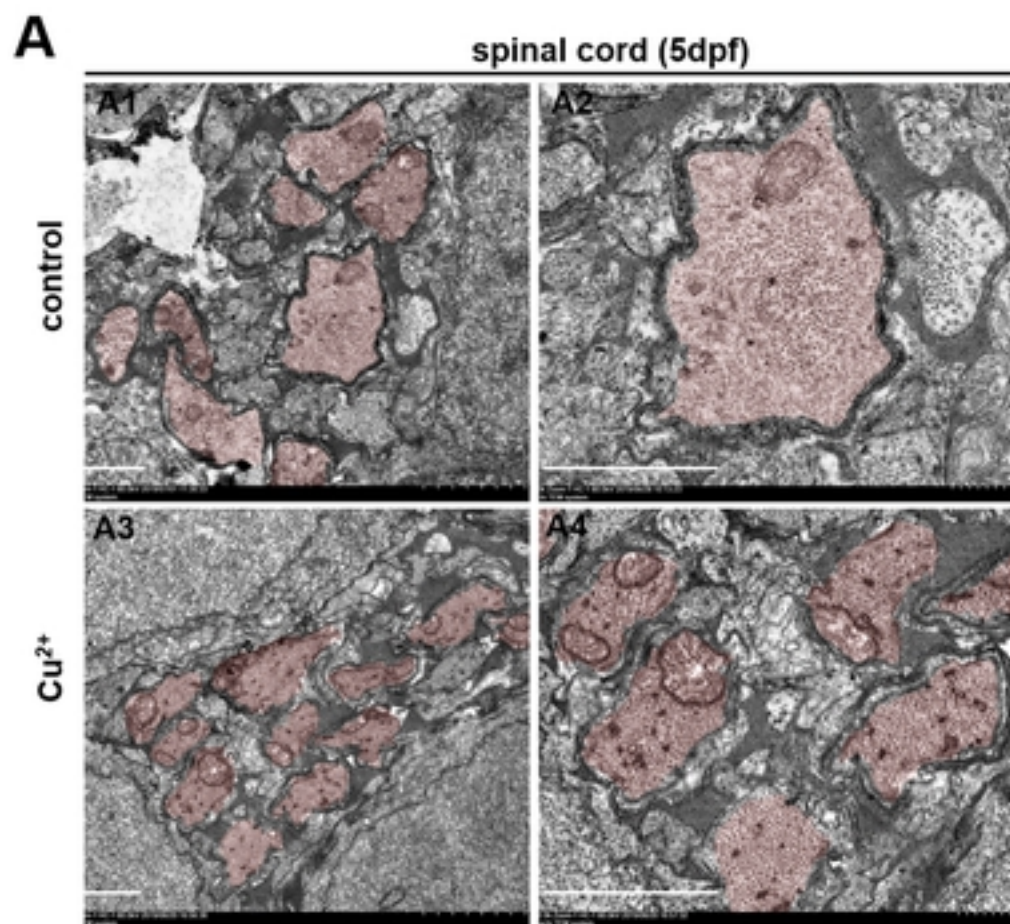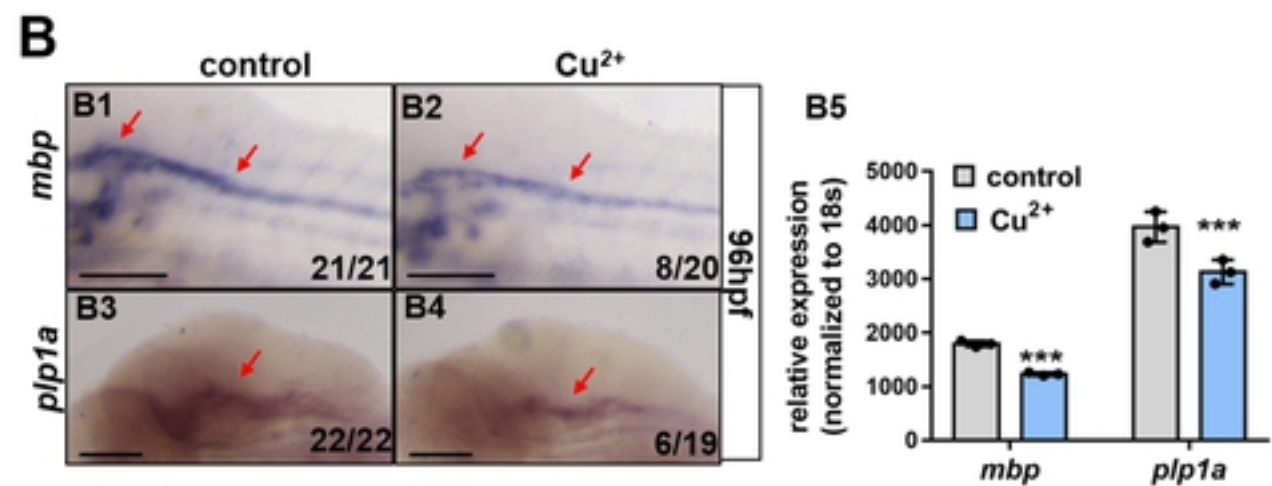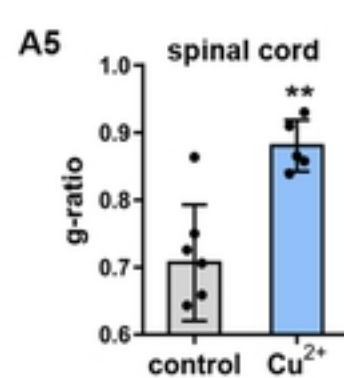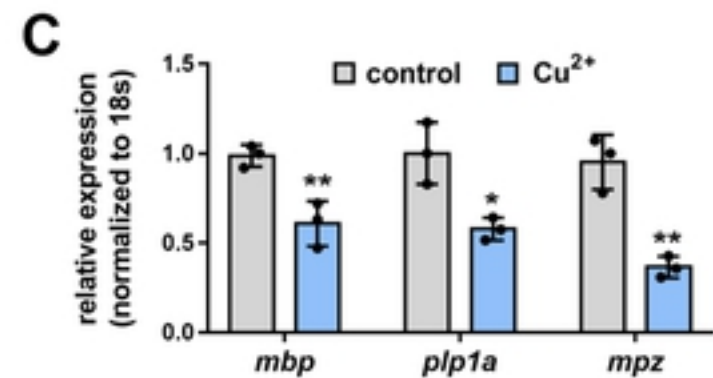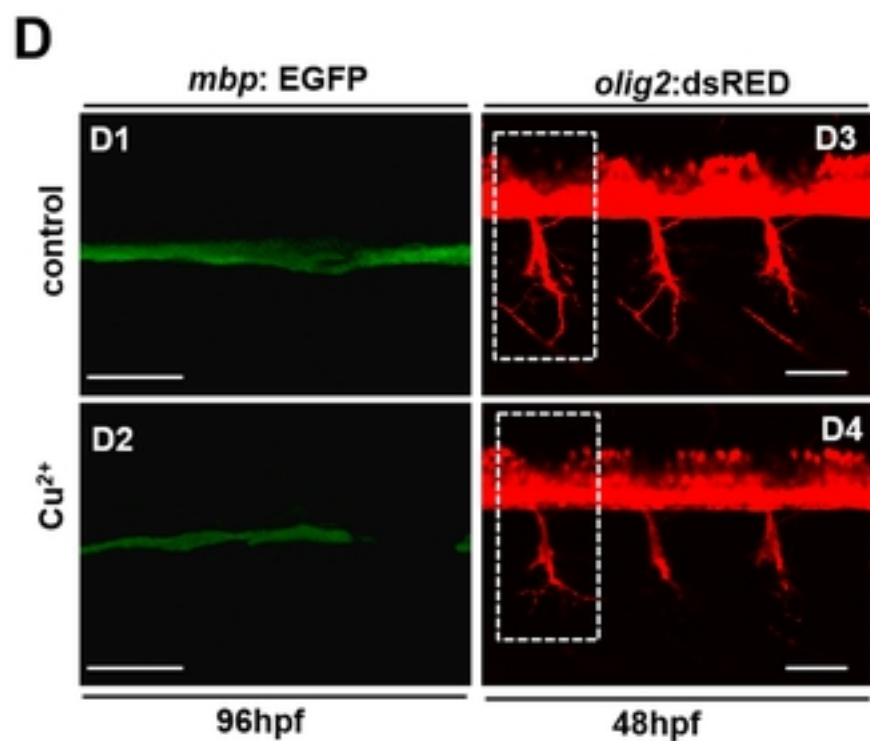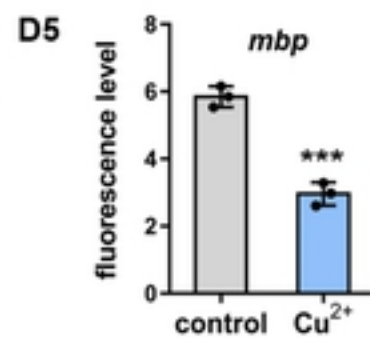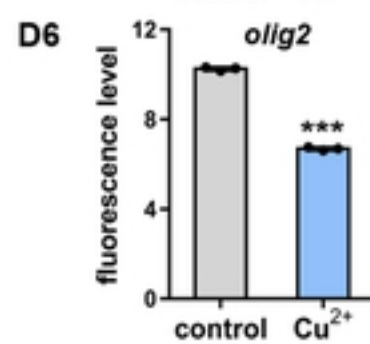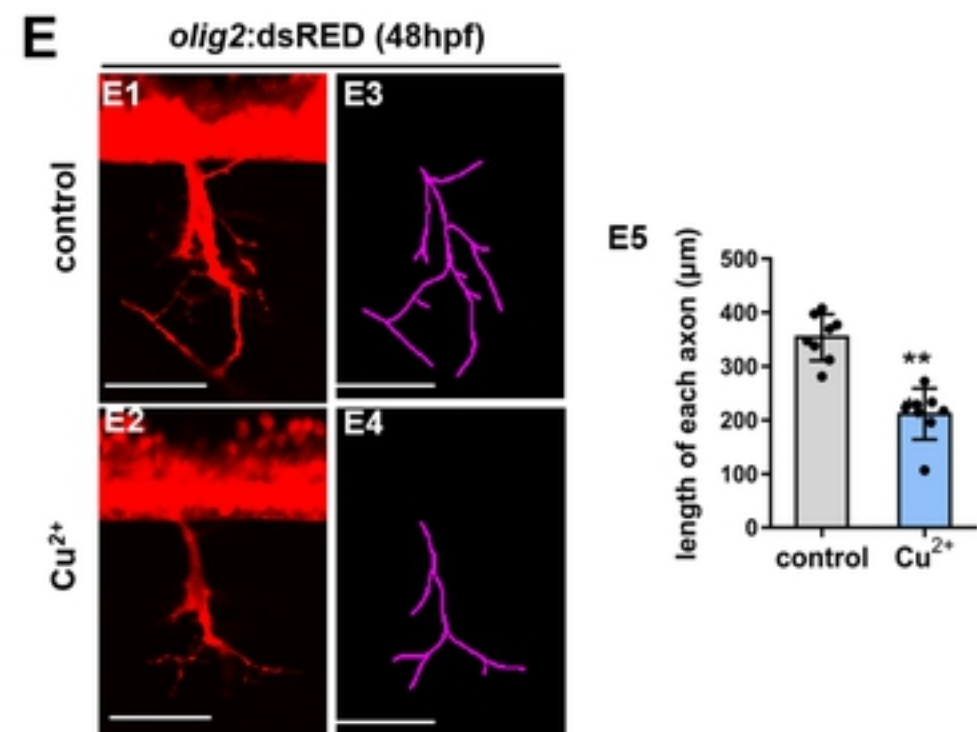

Fig1



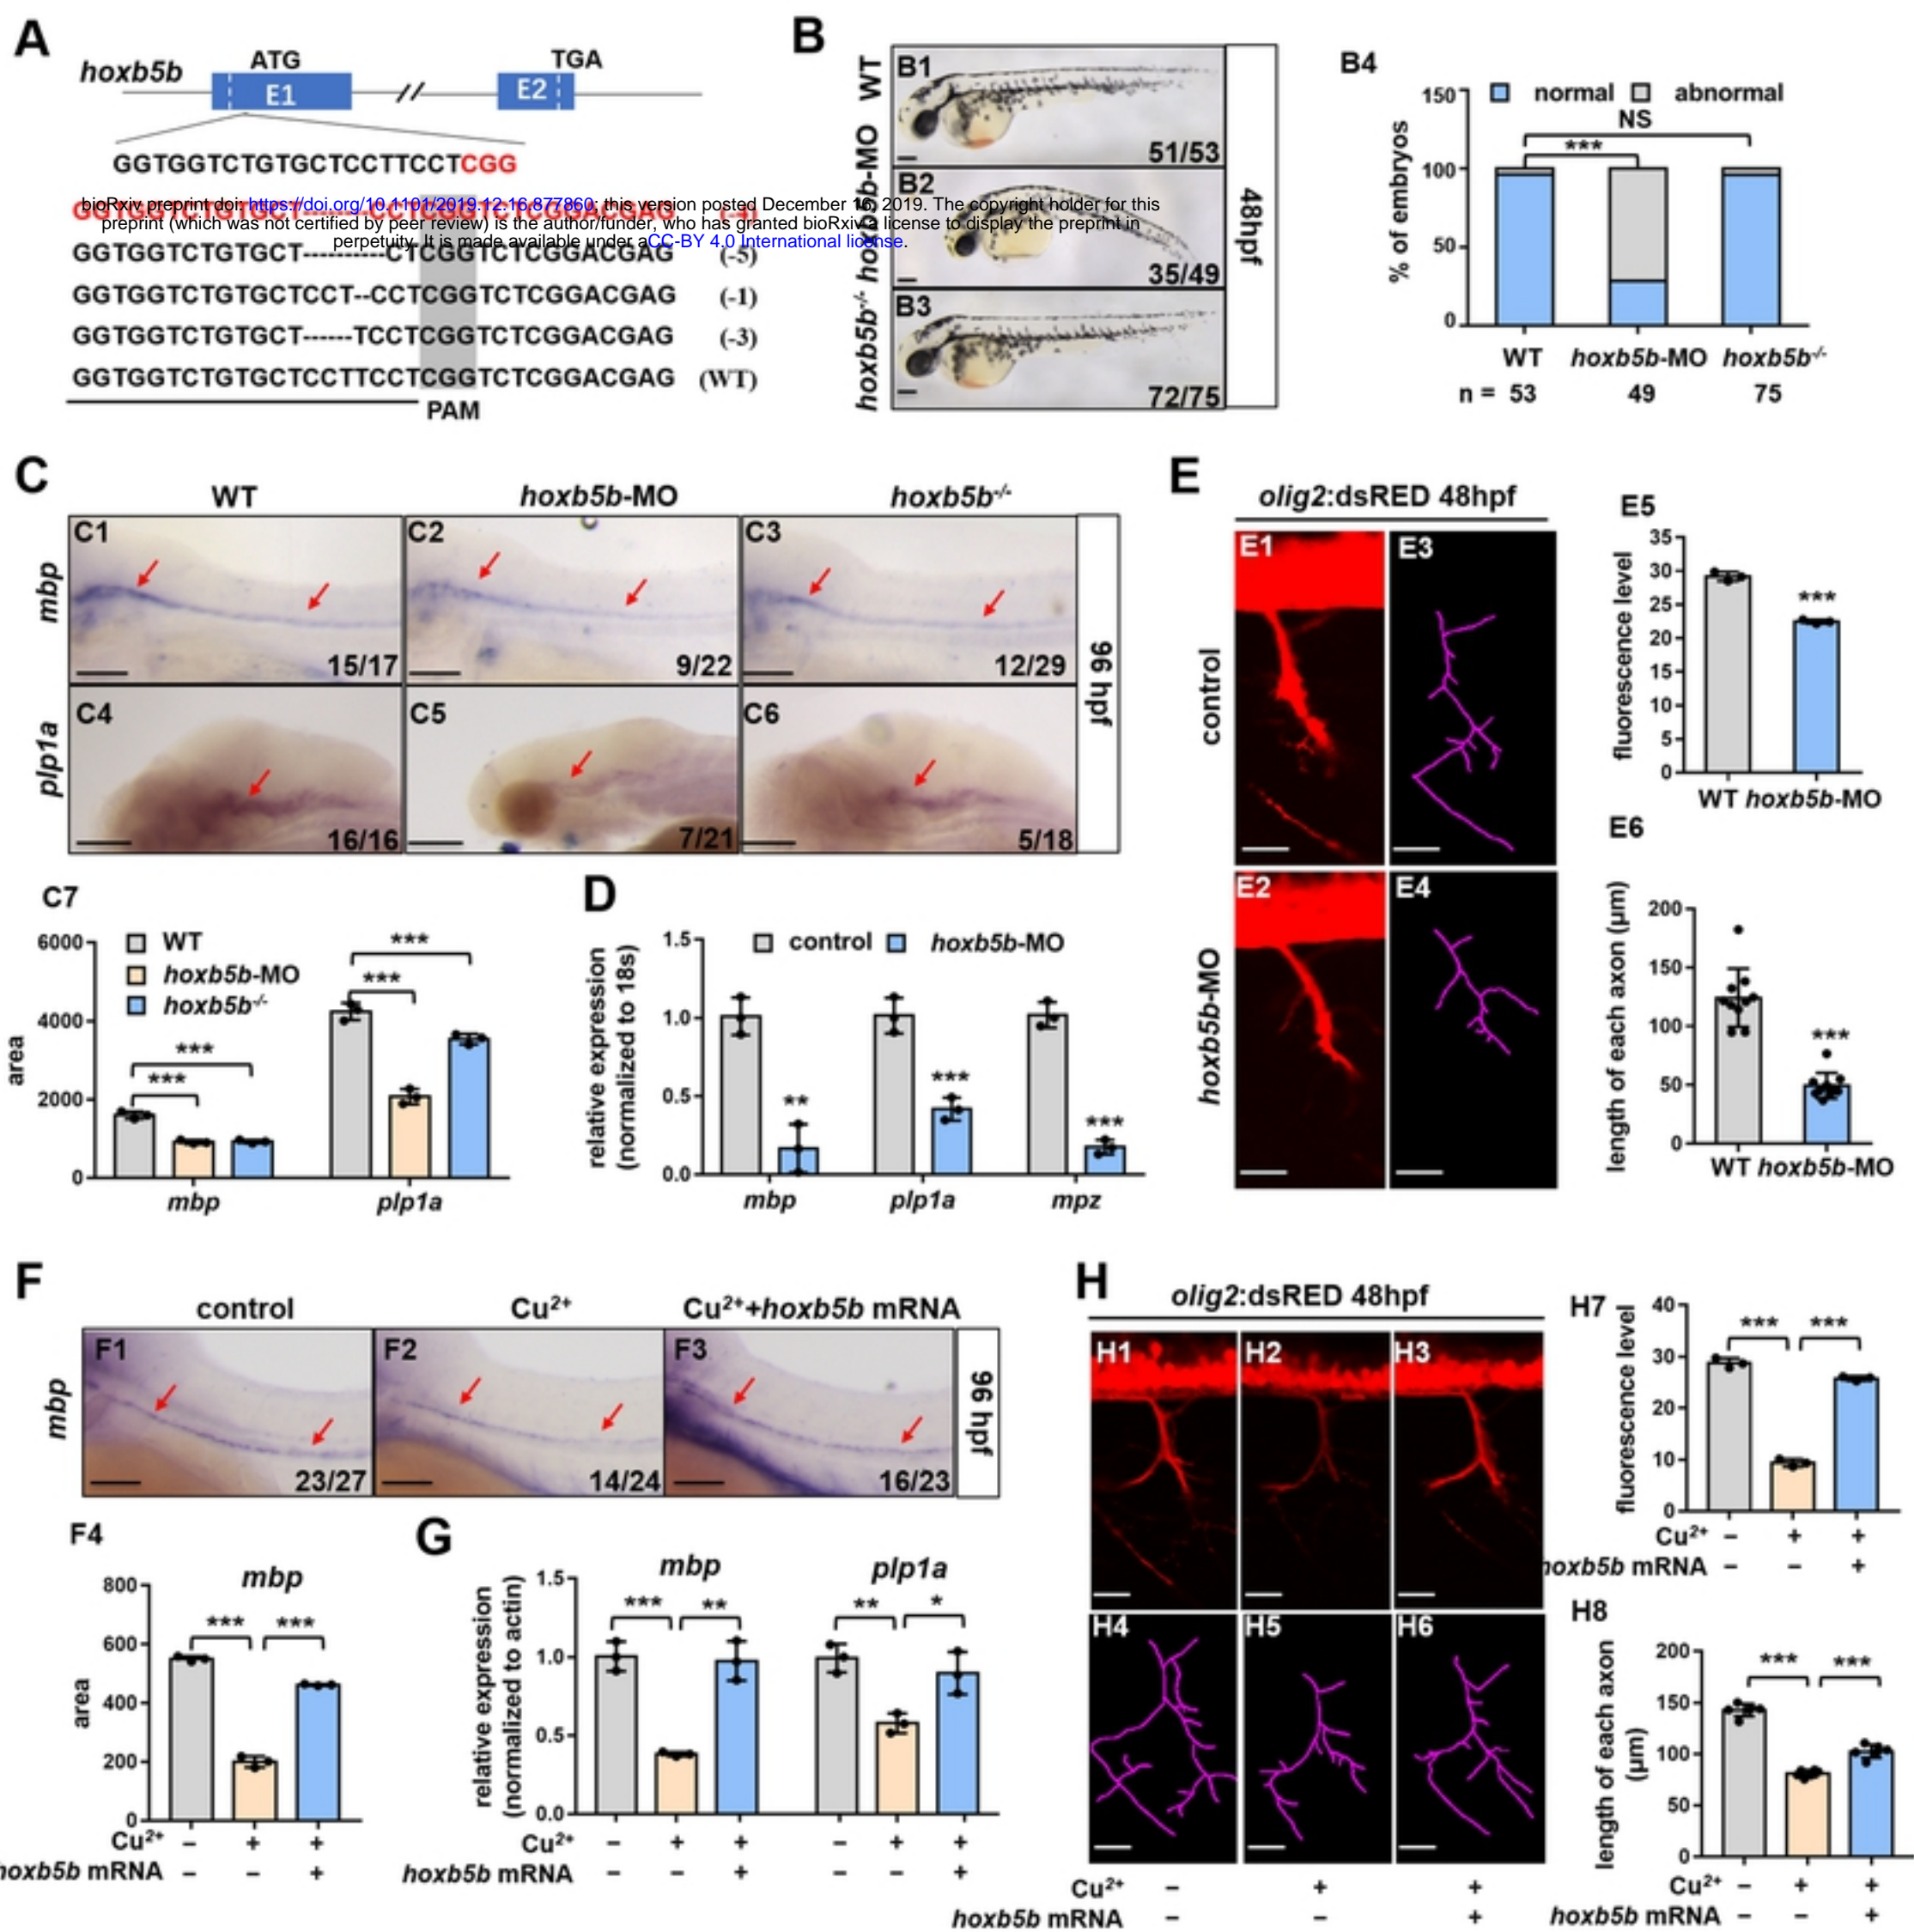

Fig2

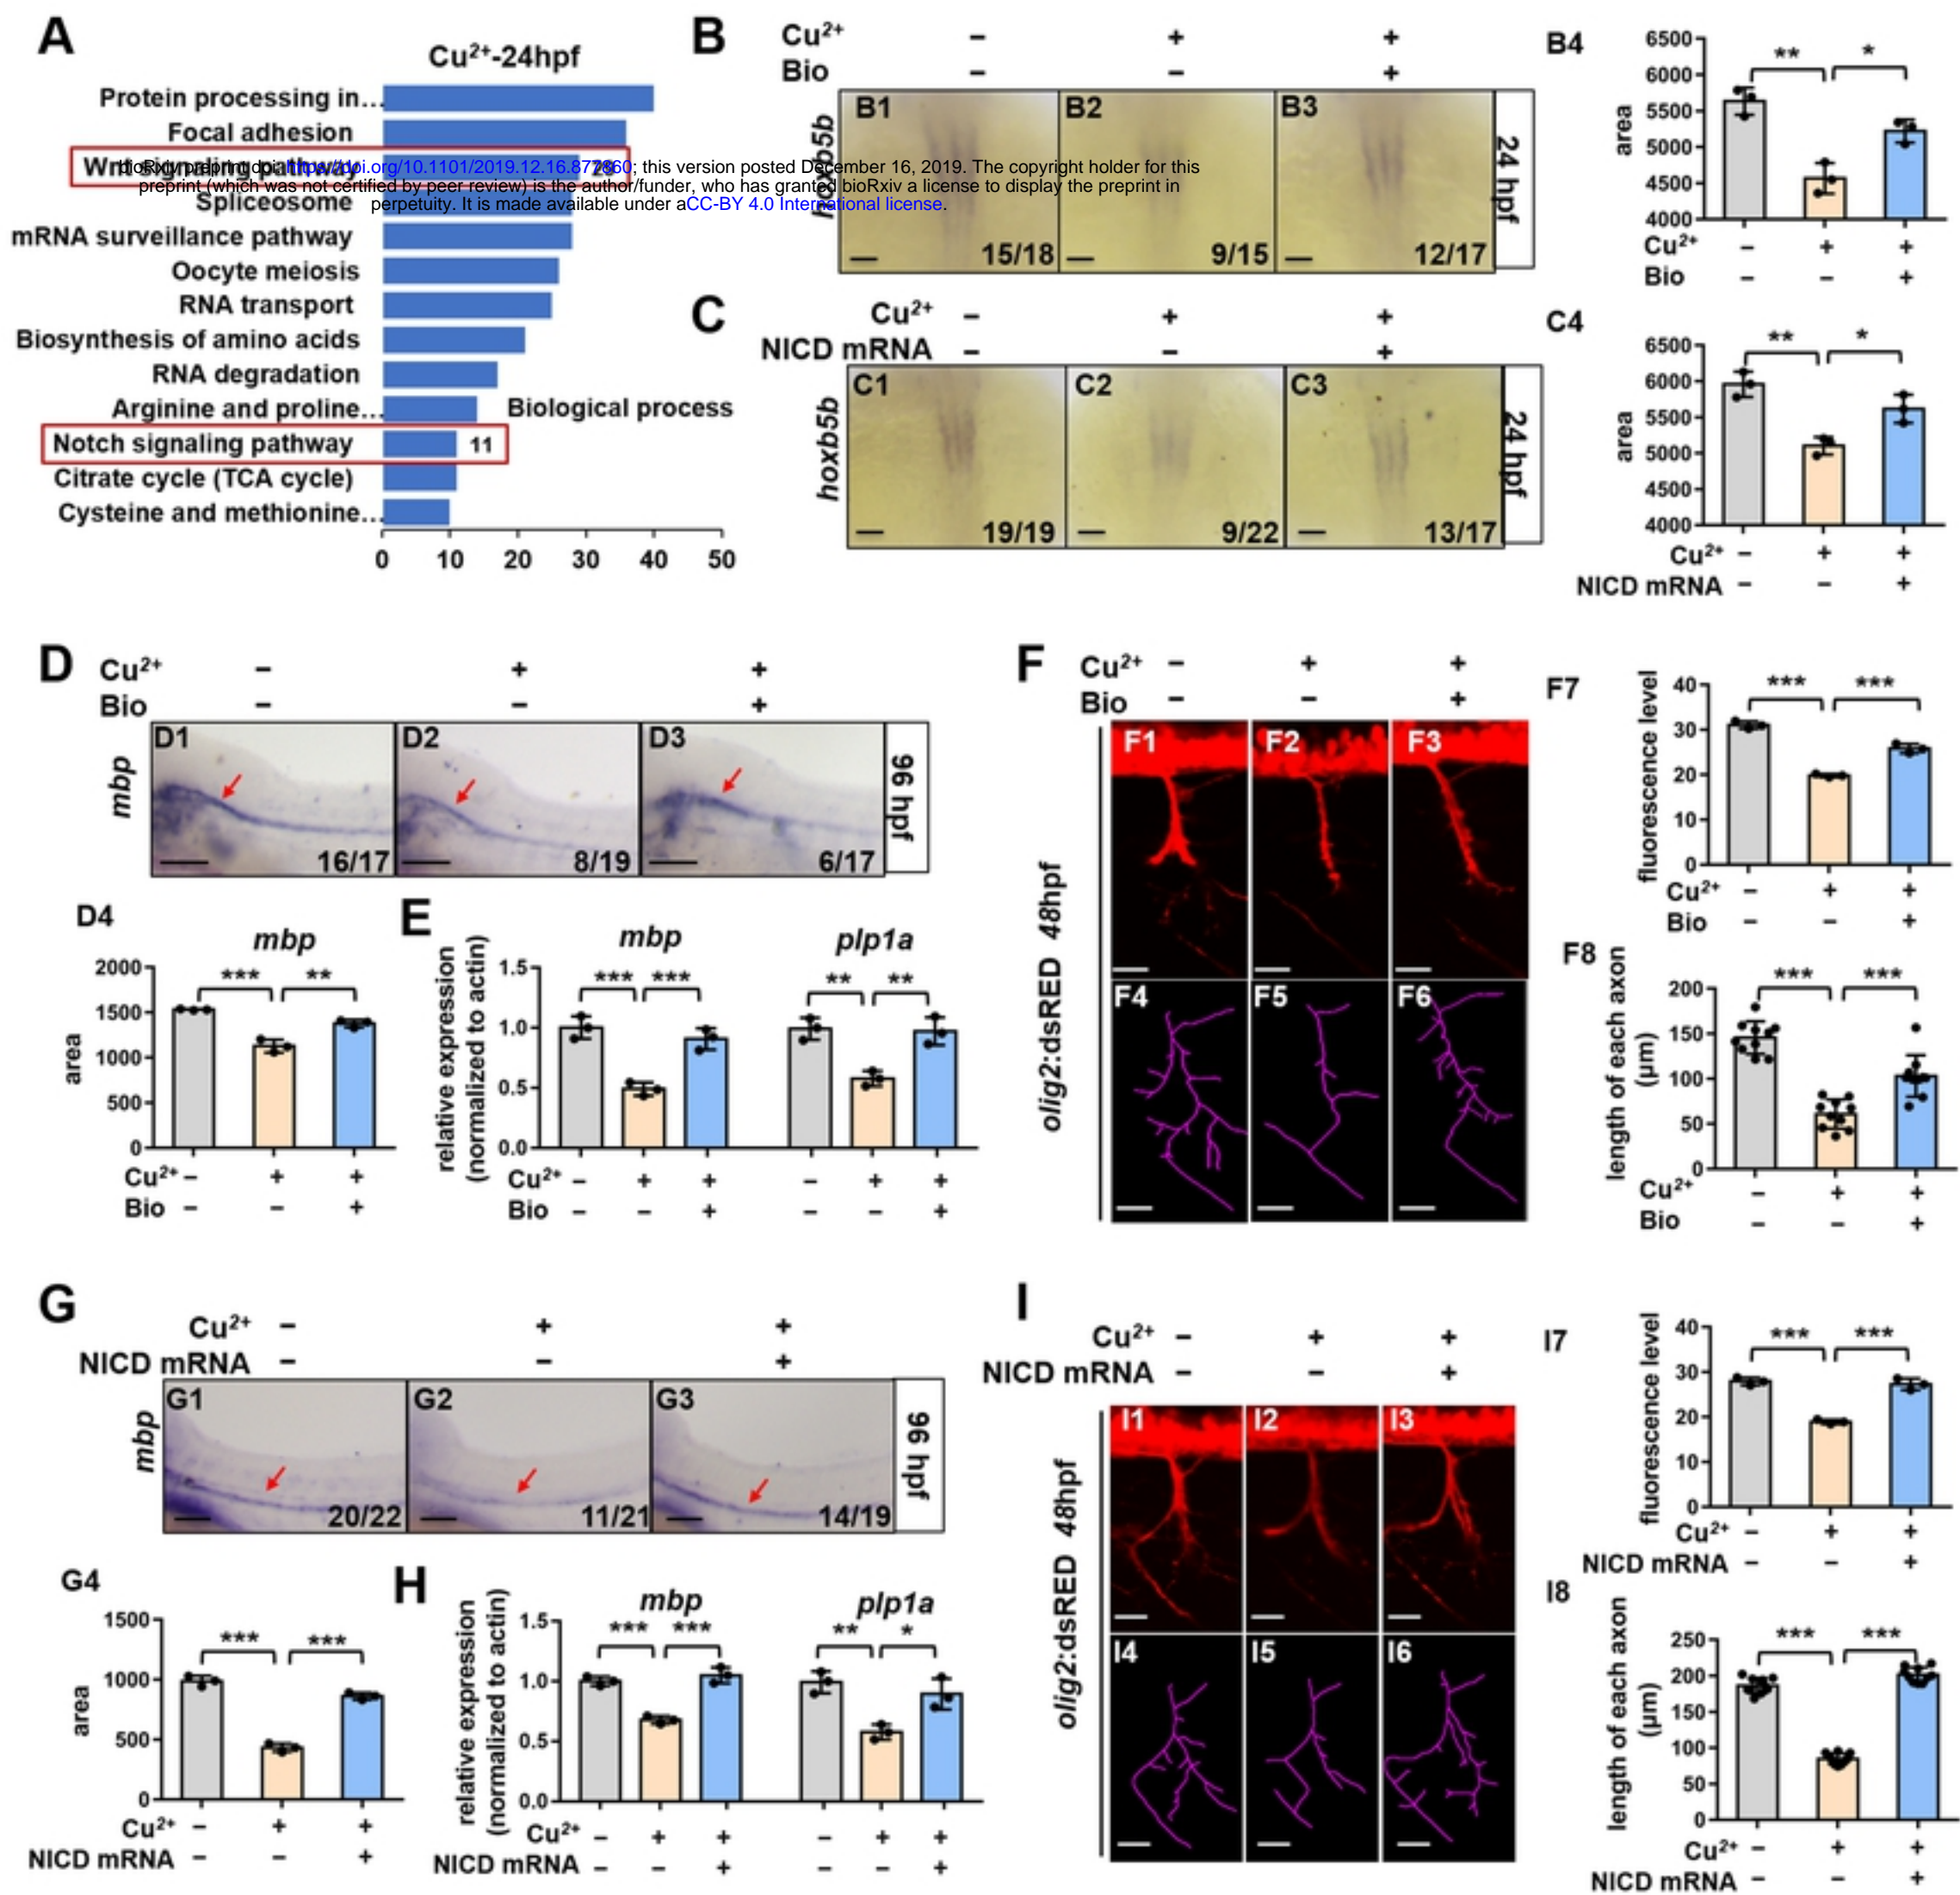

Fig3



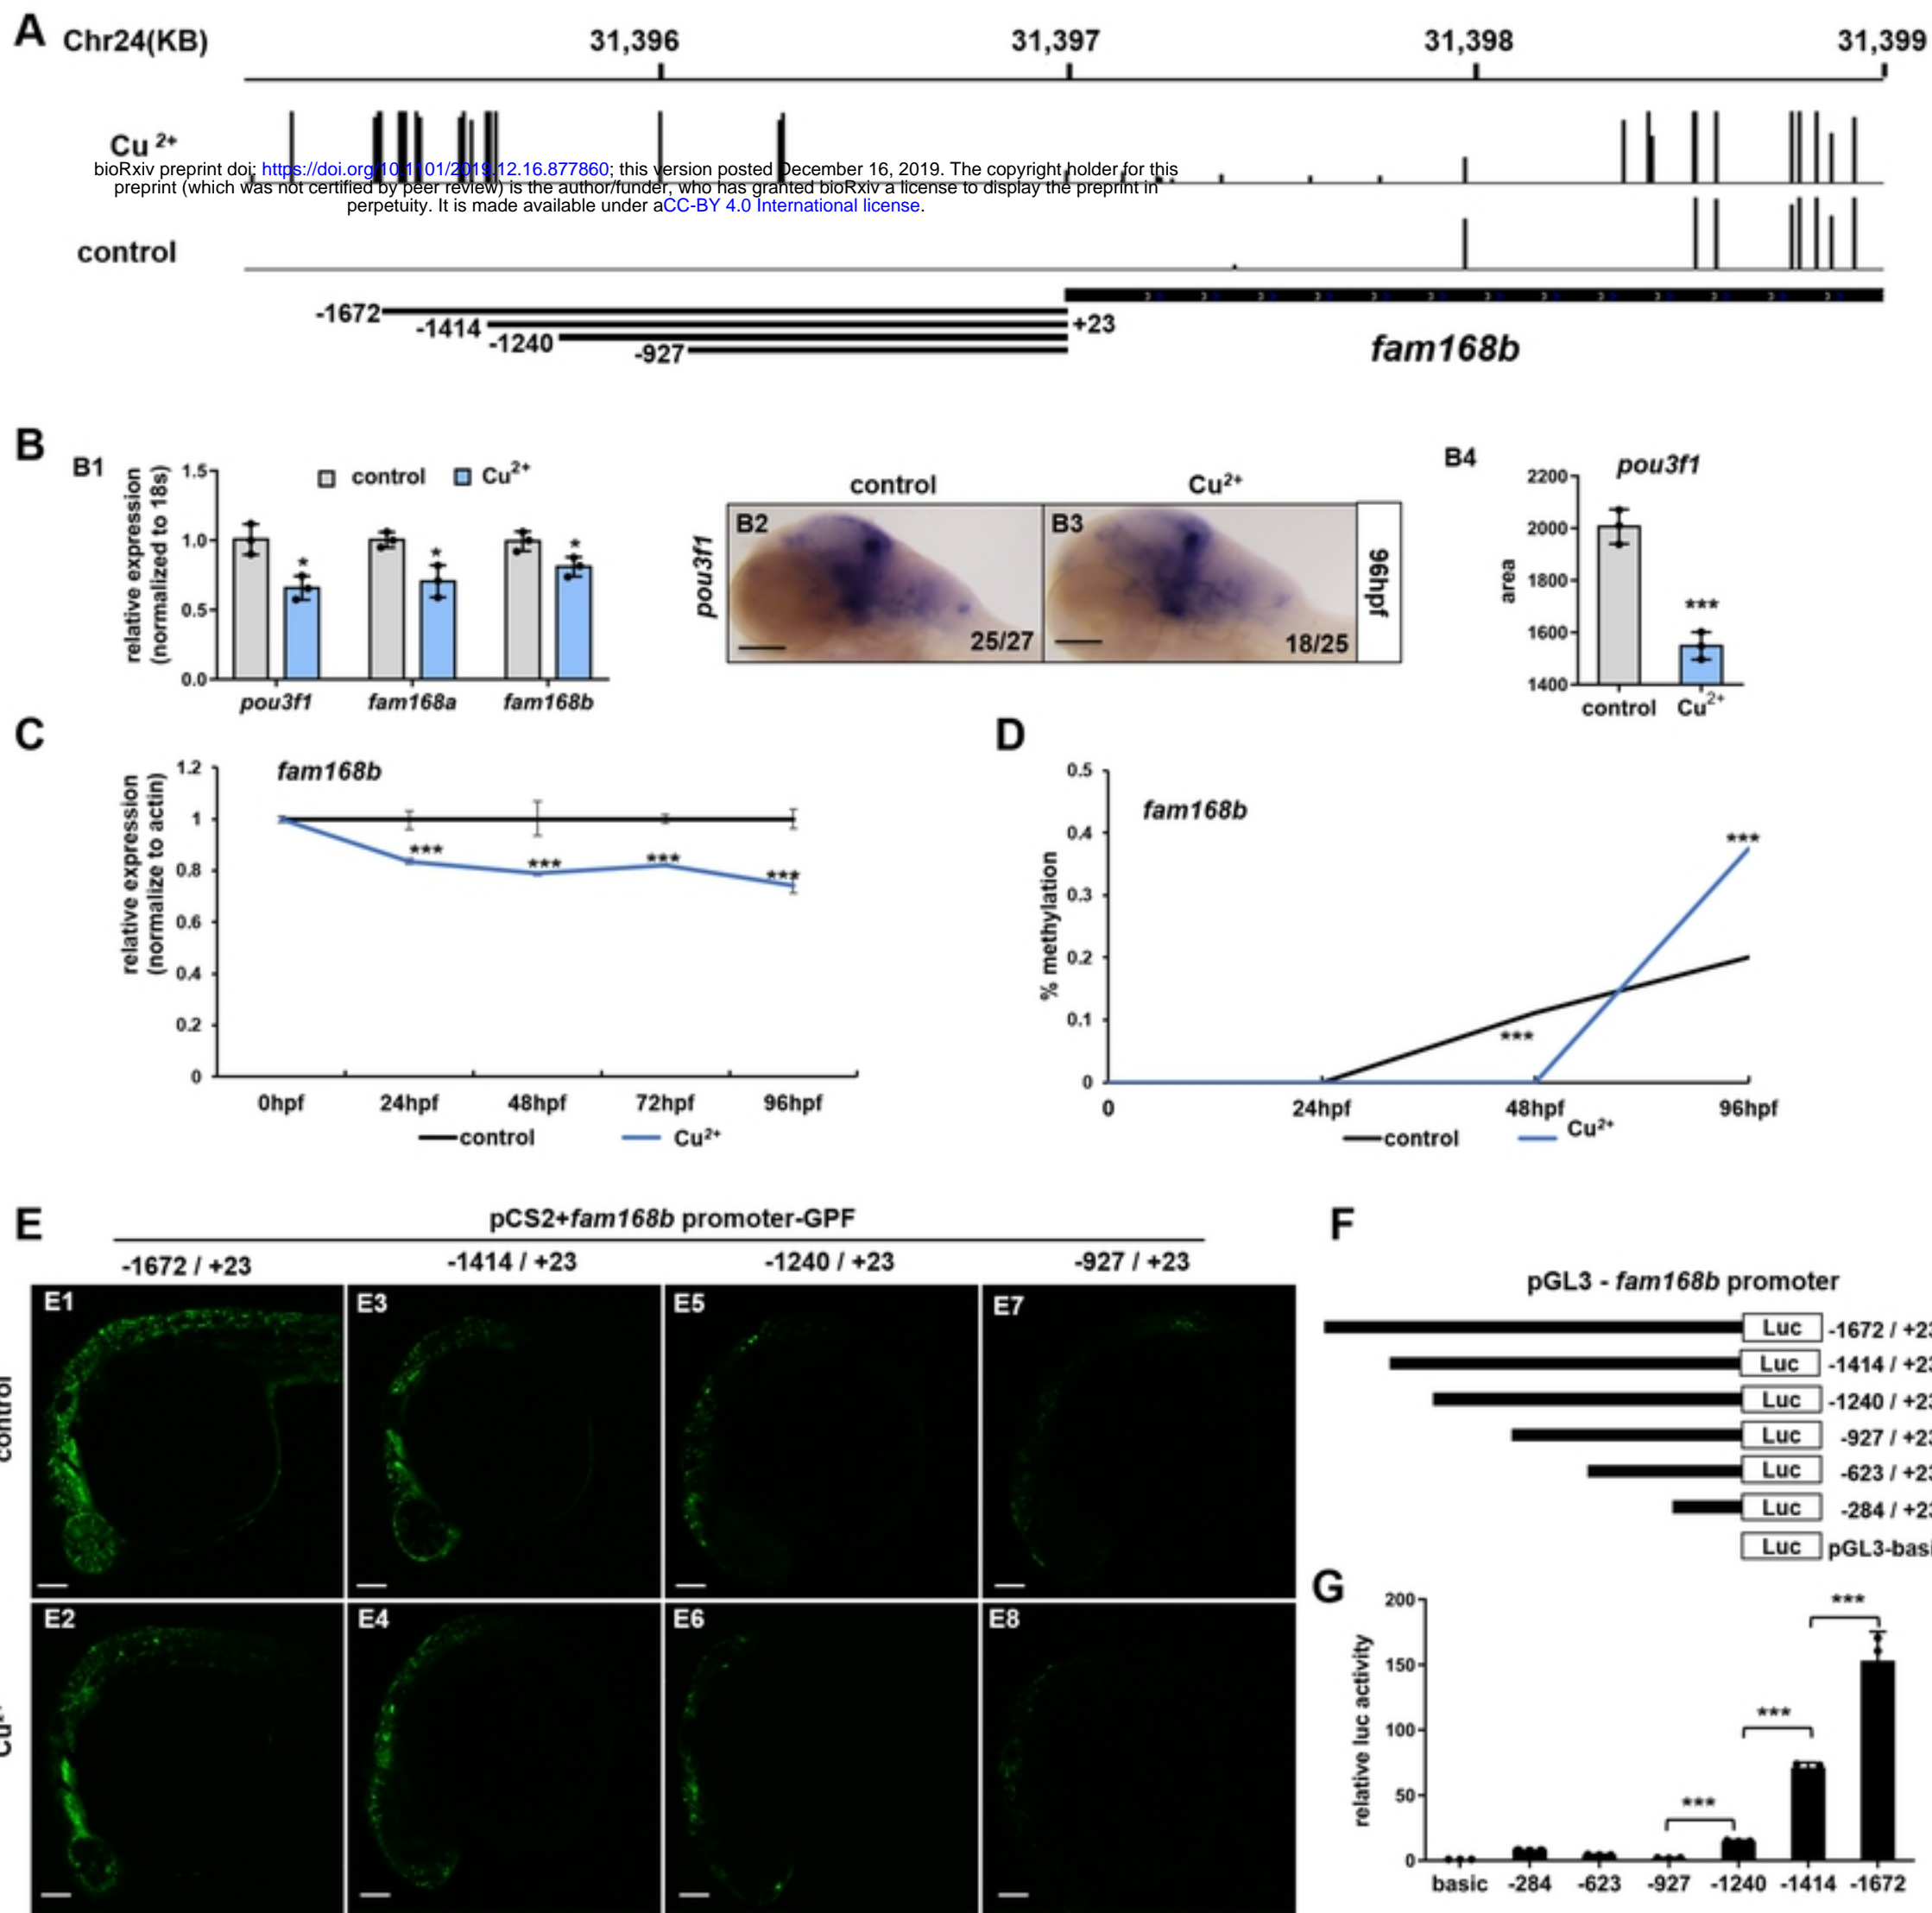

Fig4

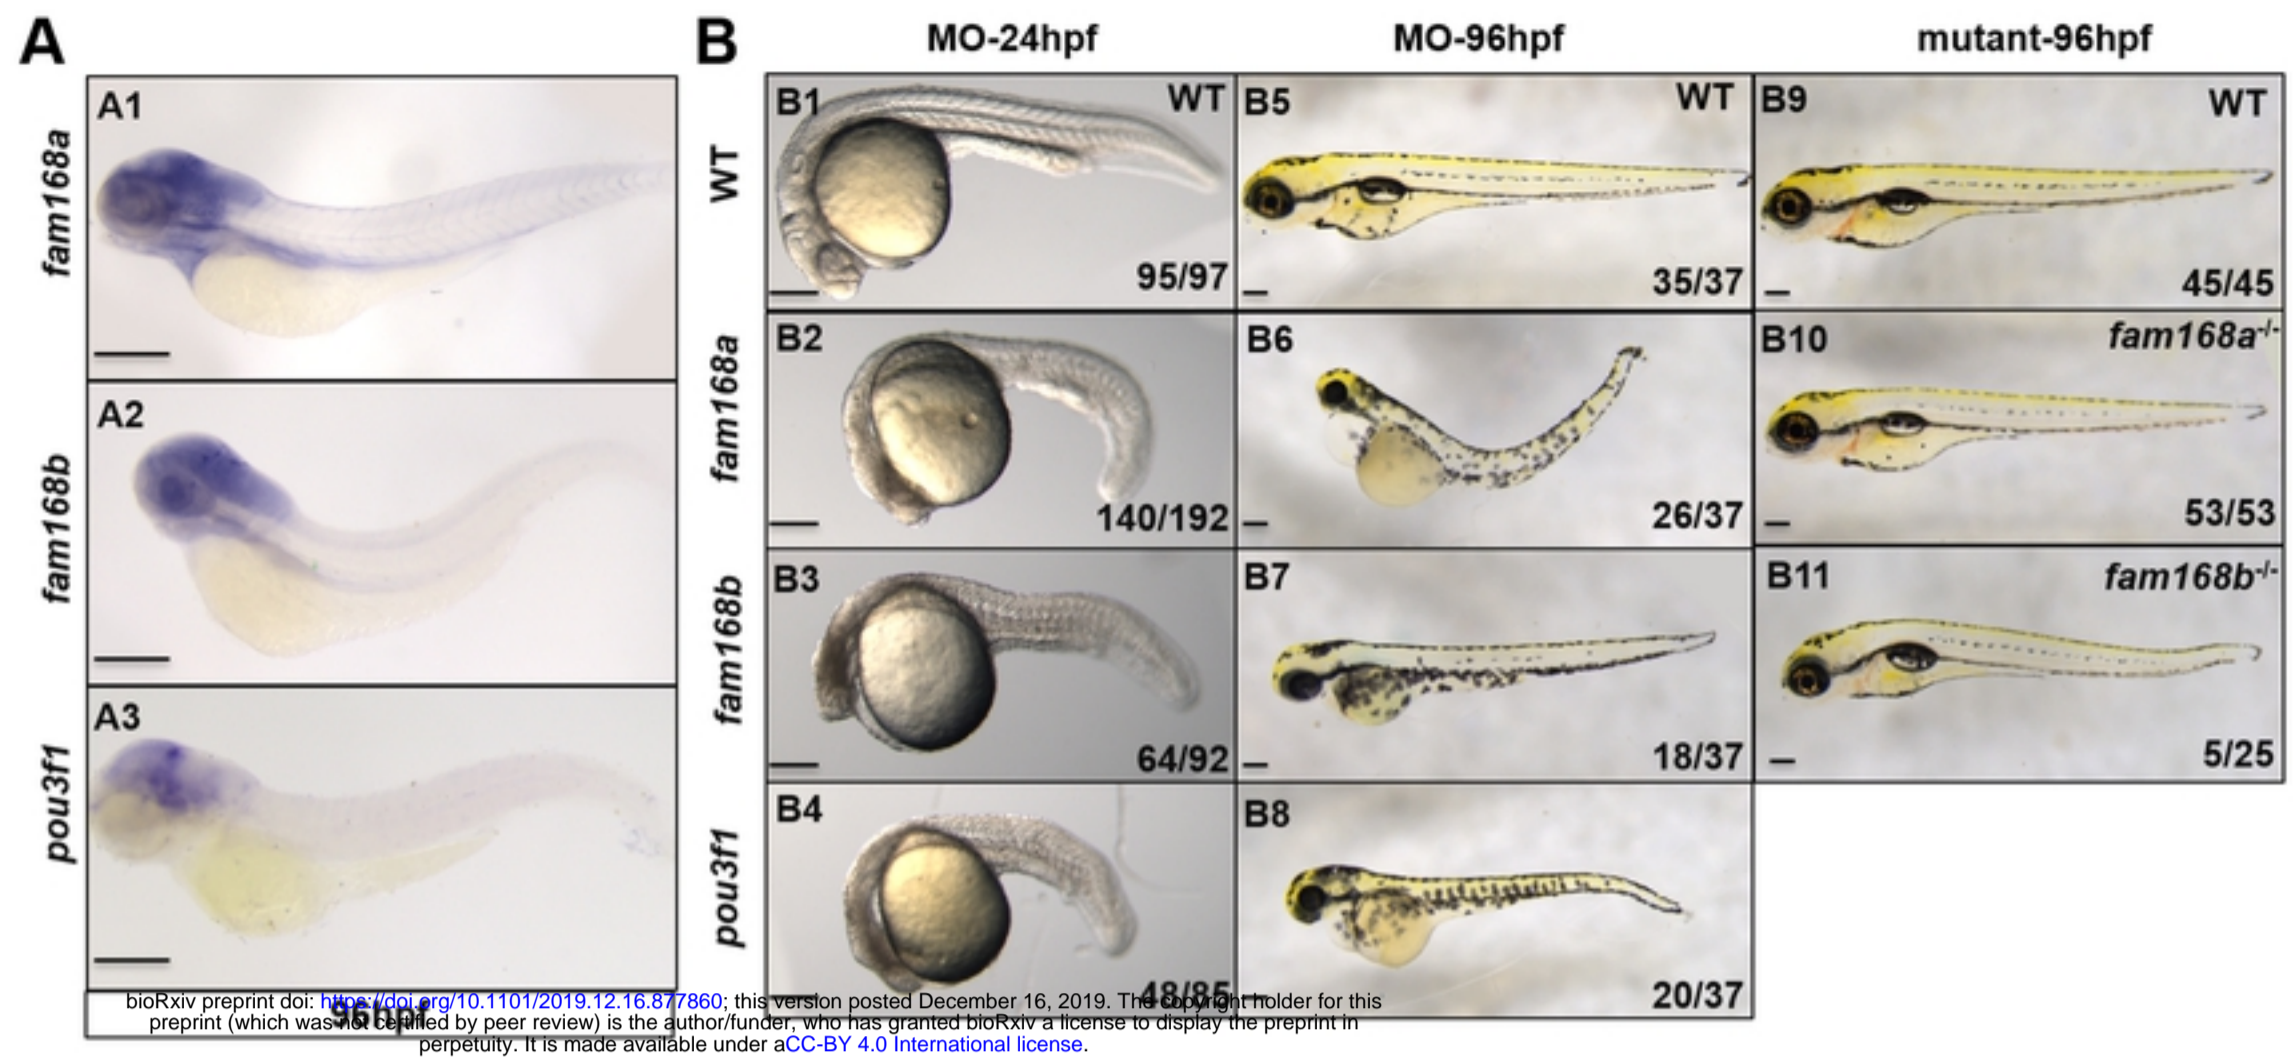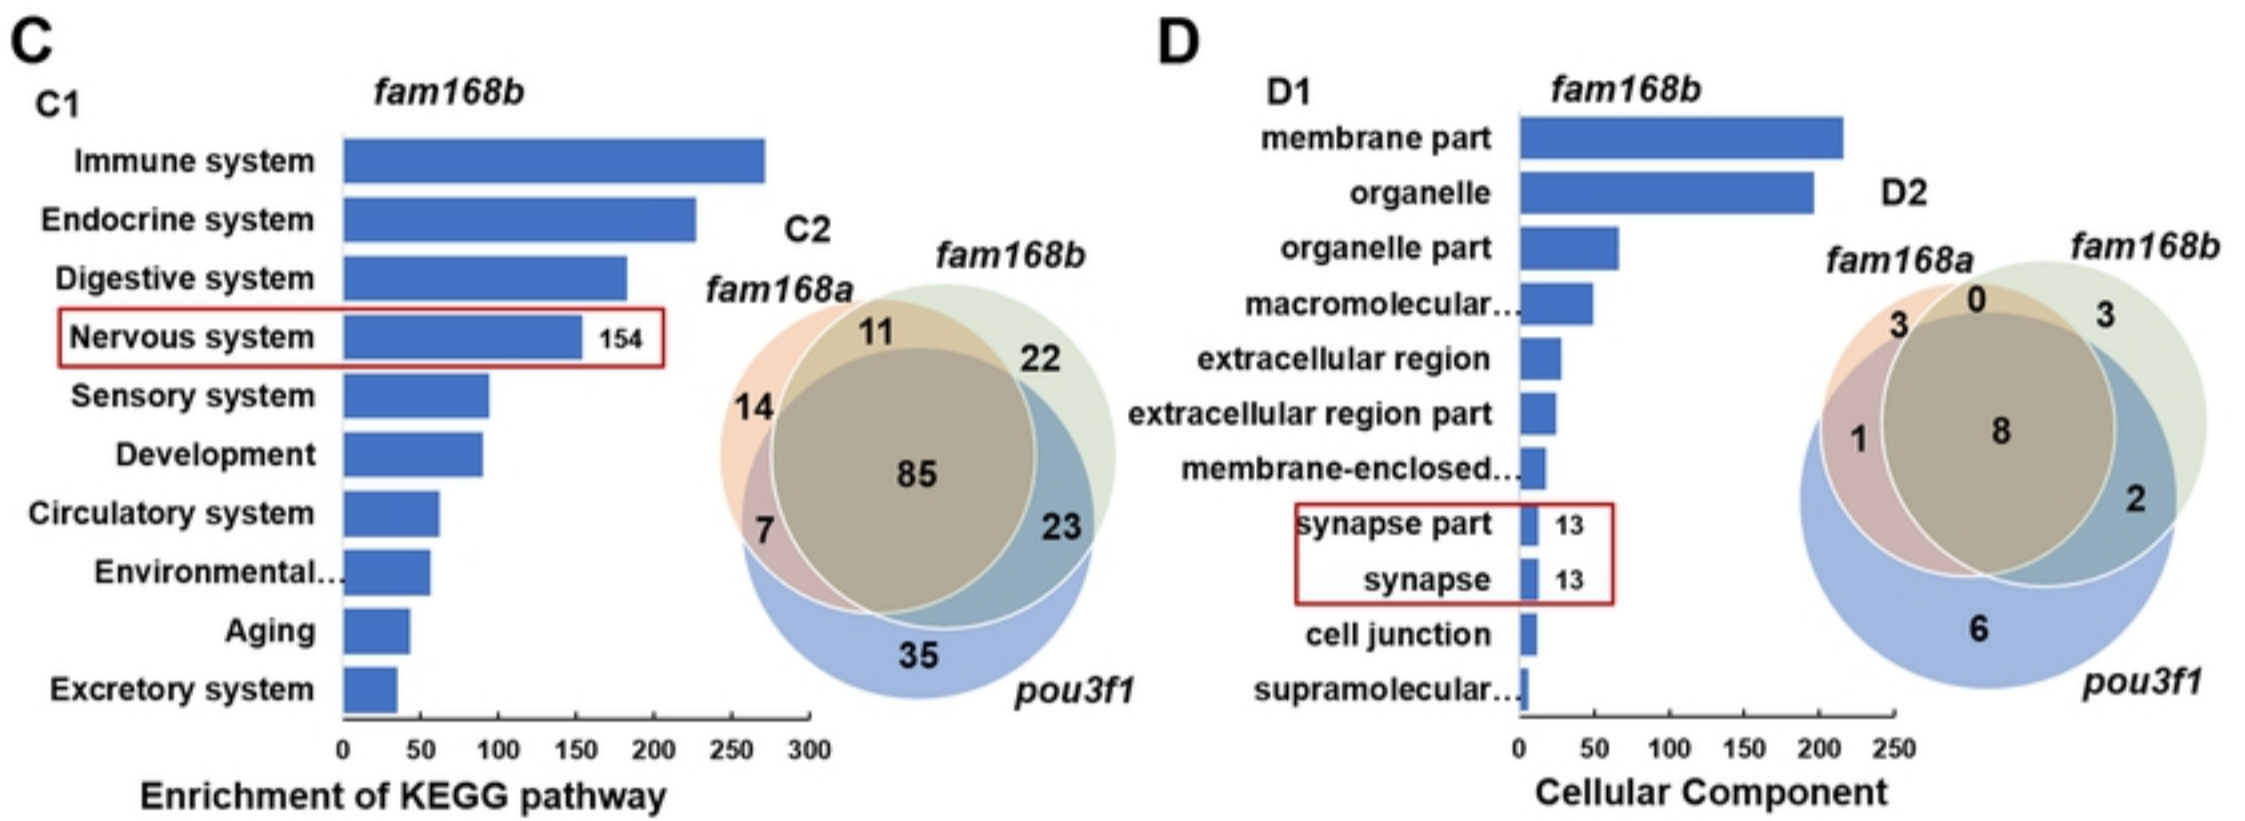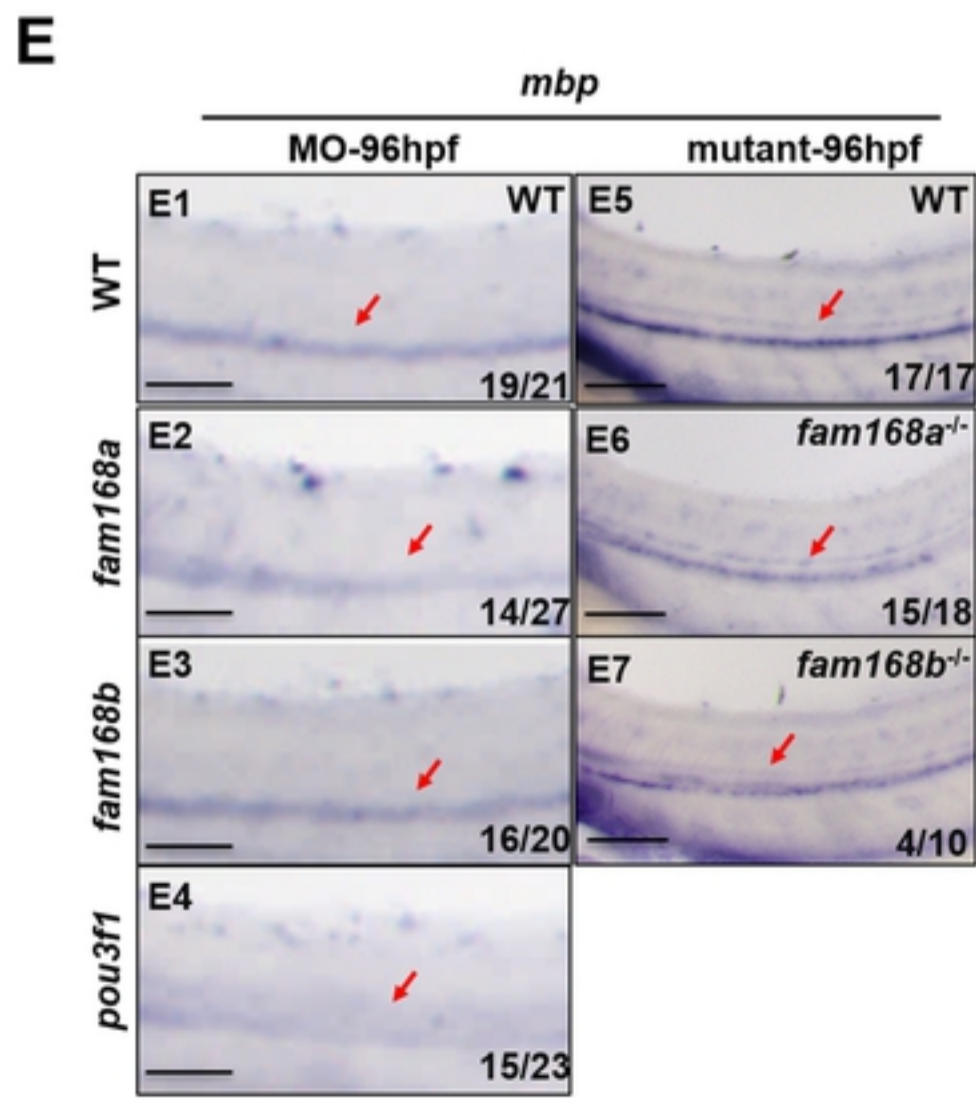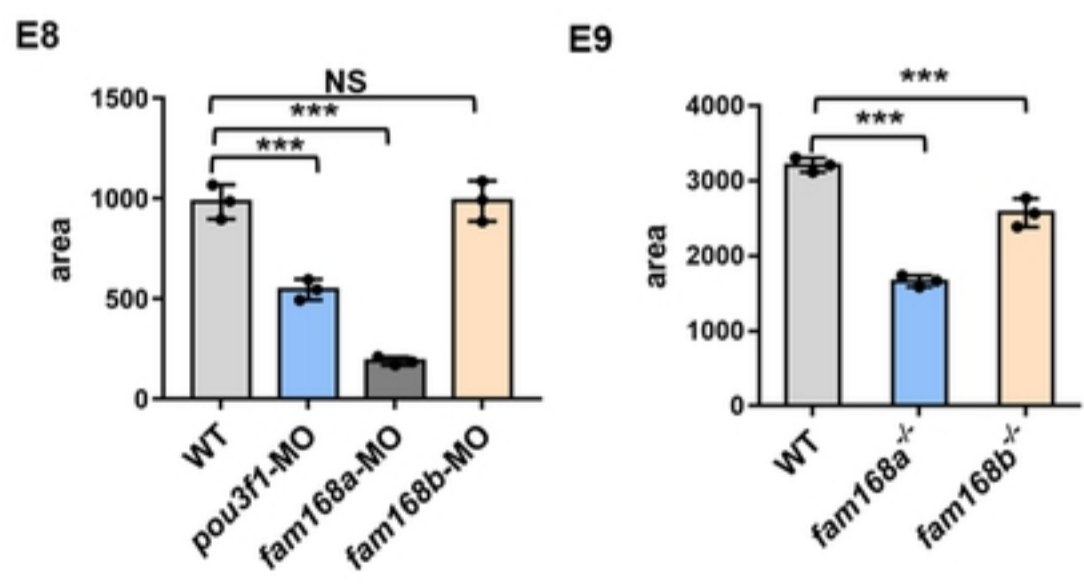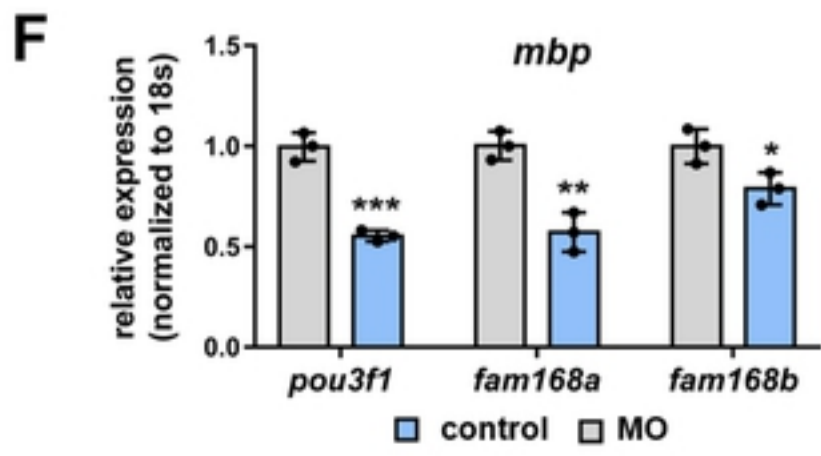

Fig5



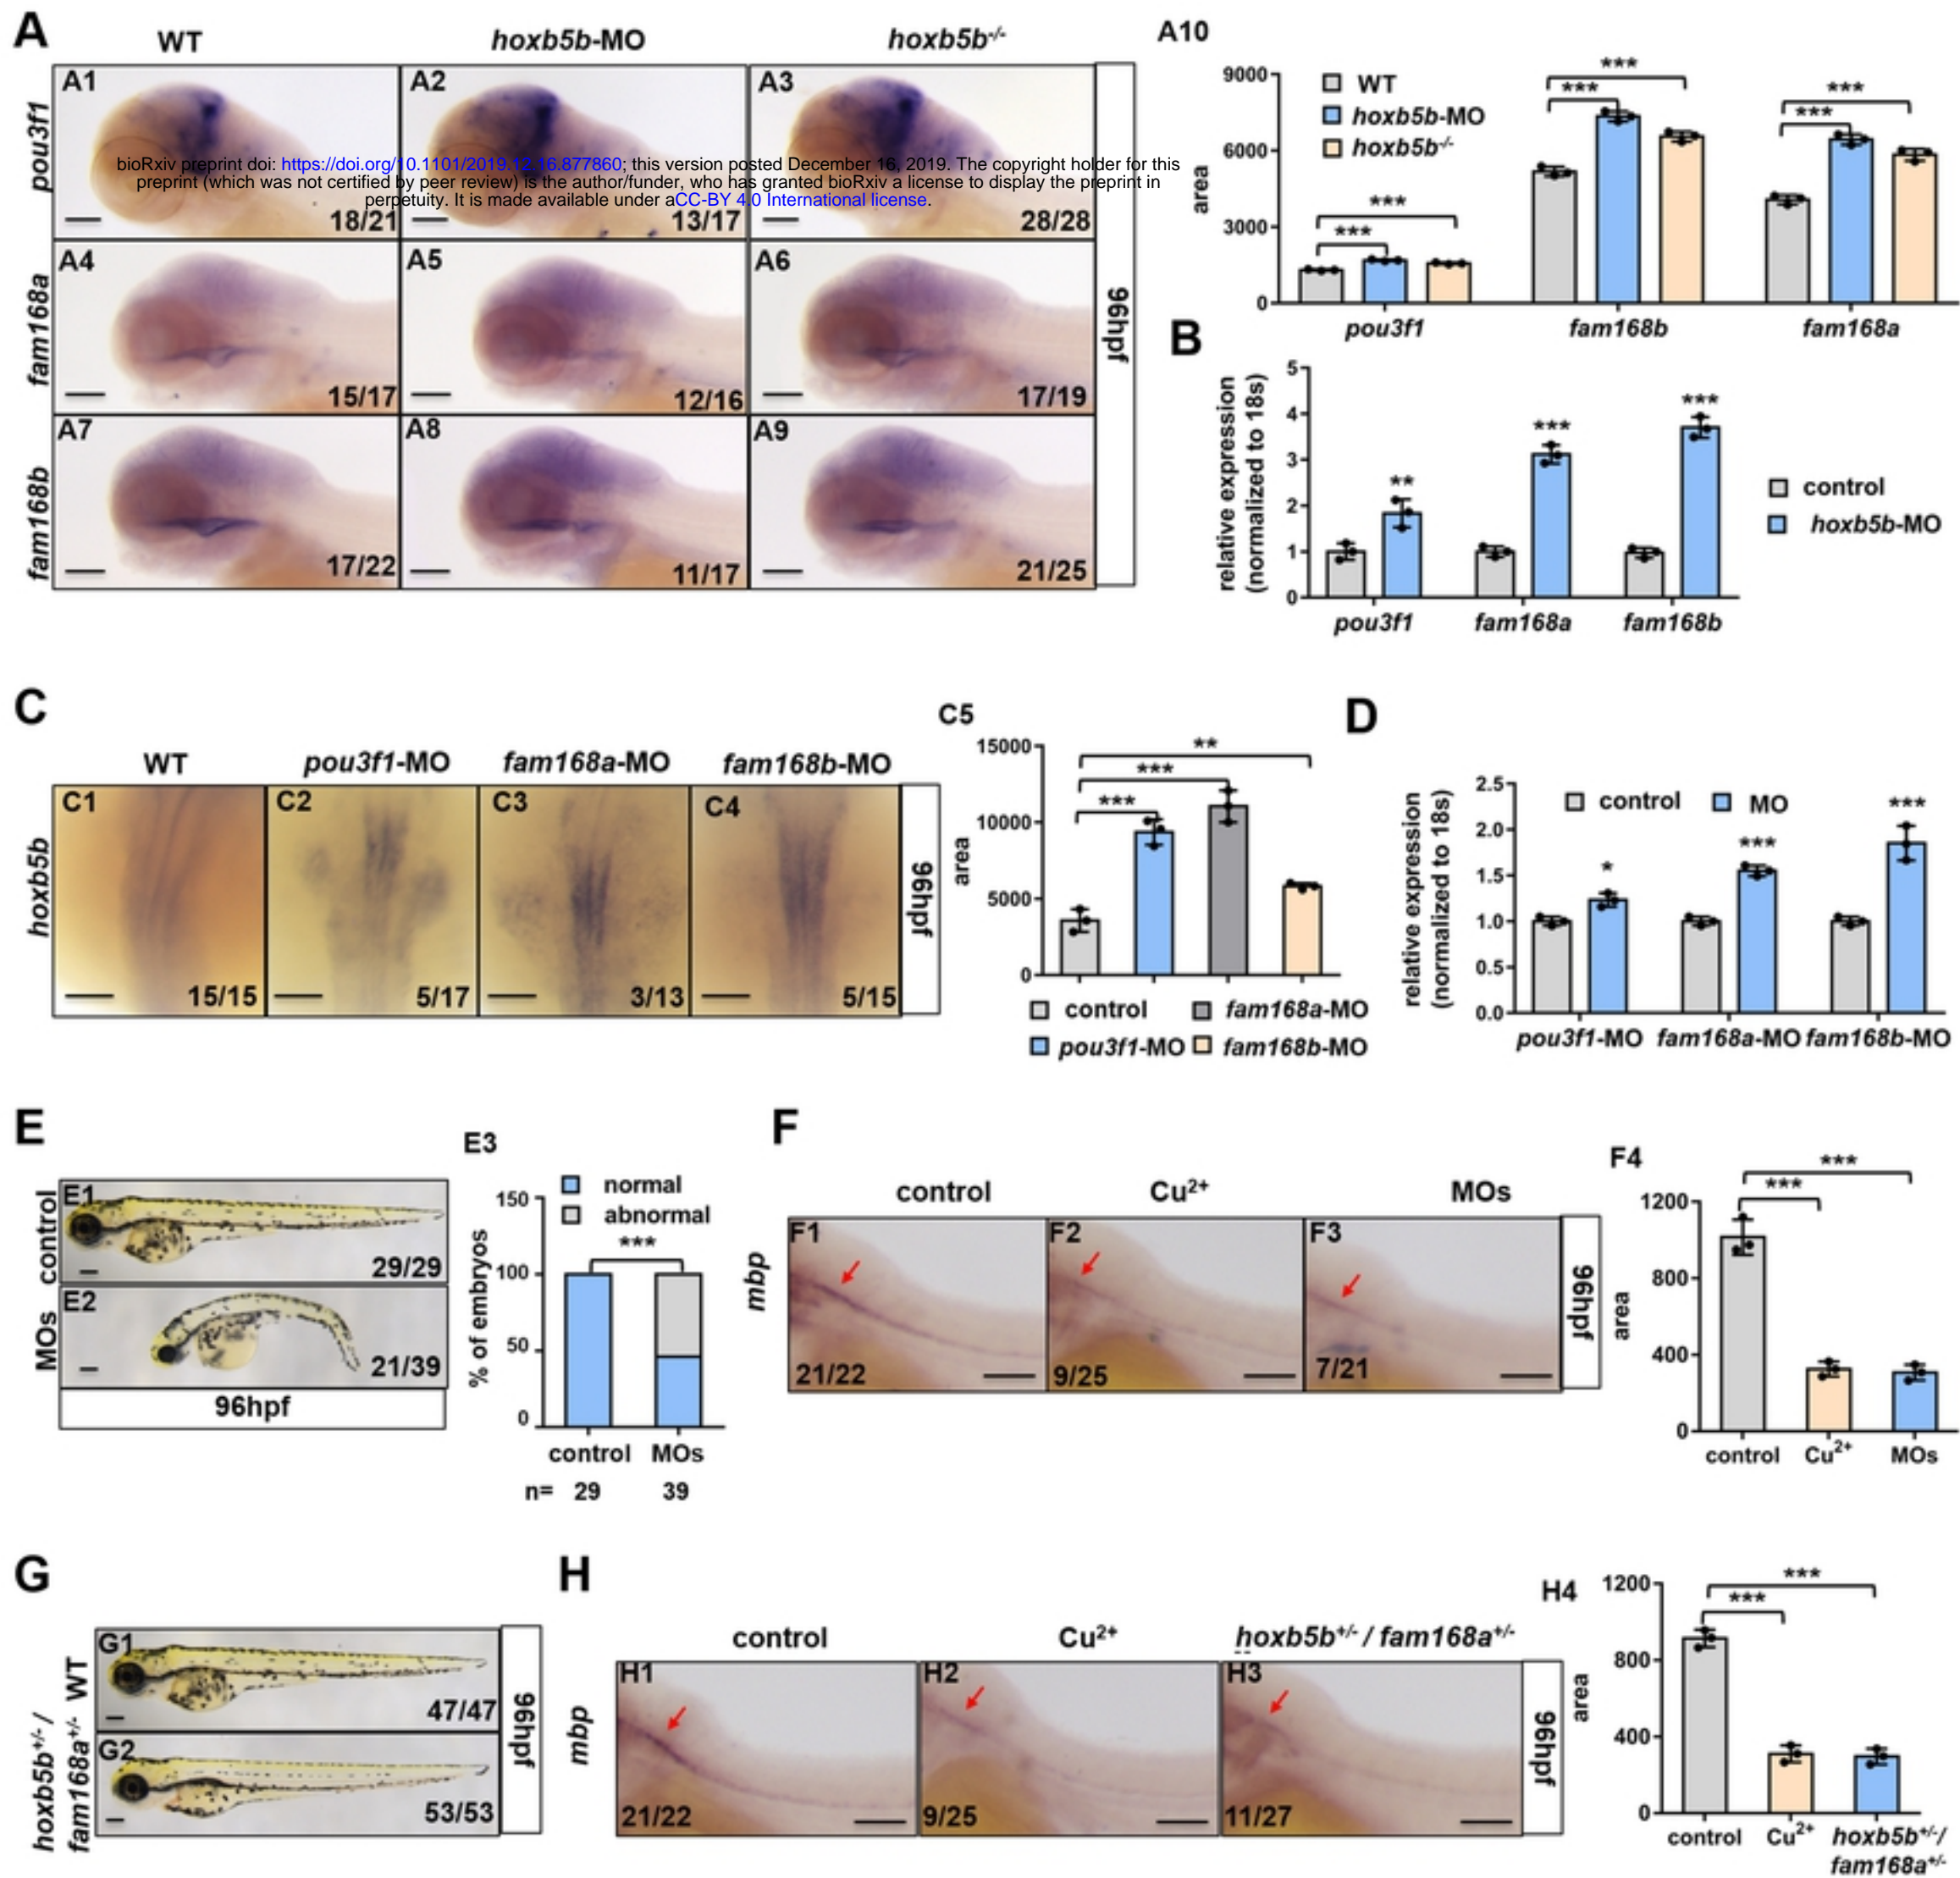

Fig6



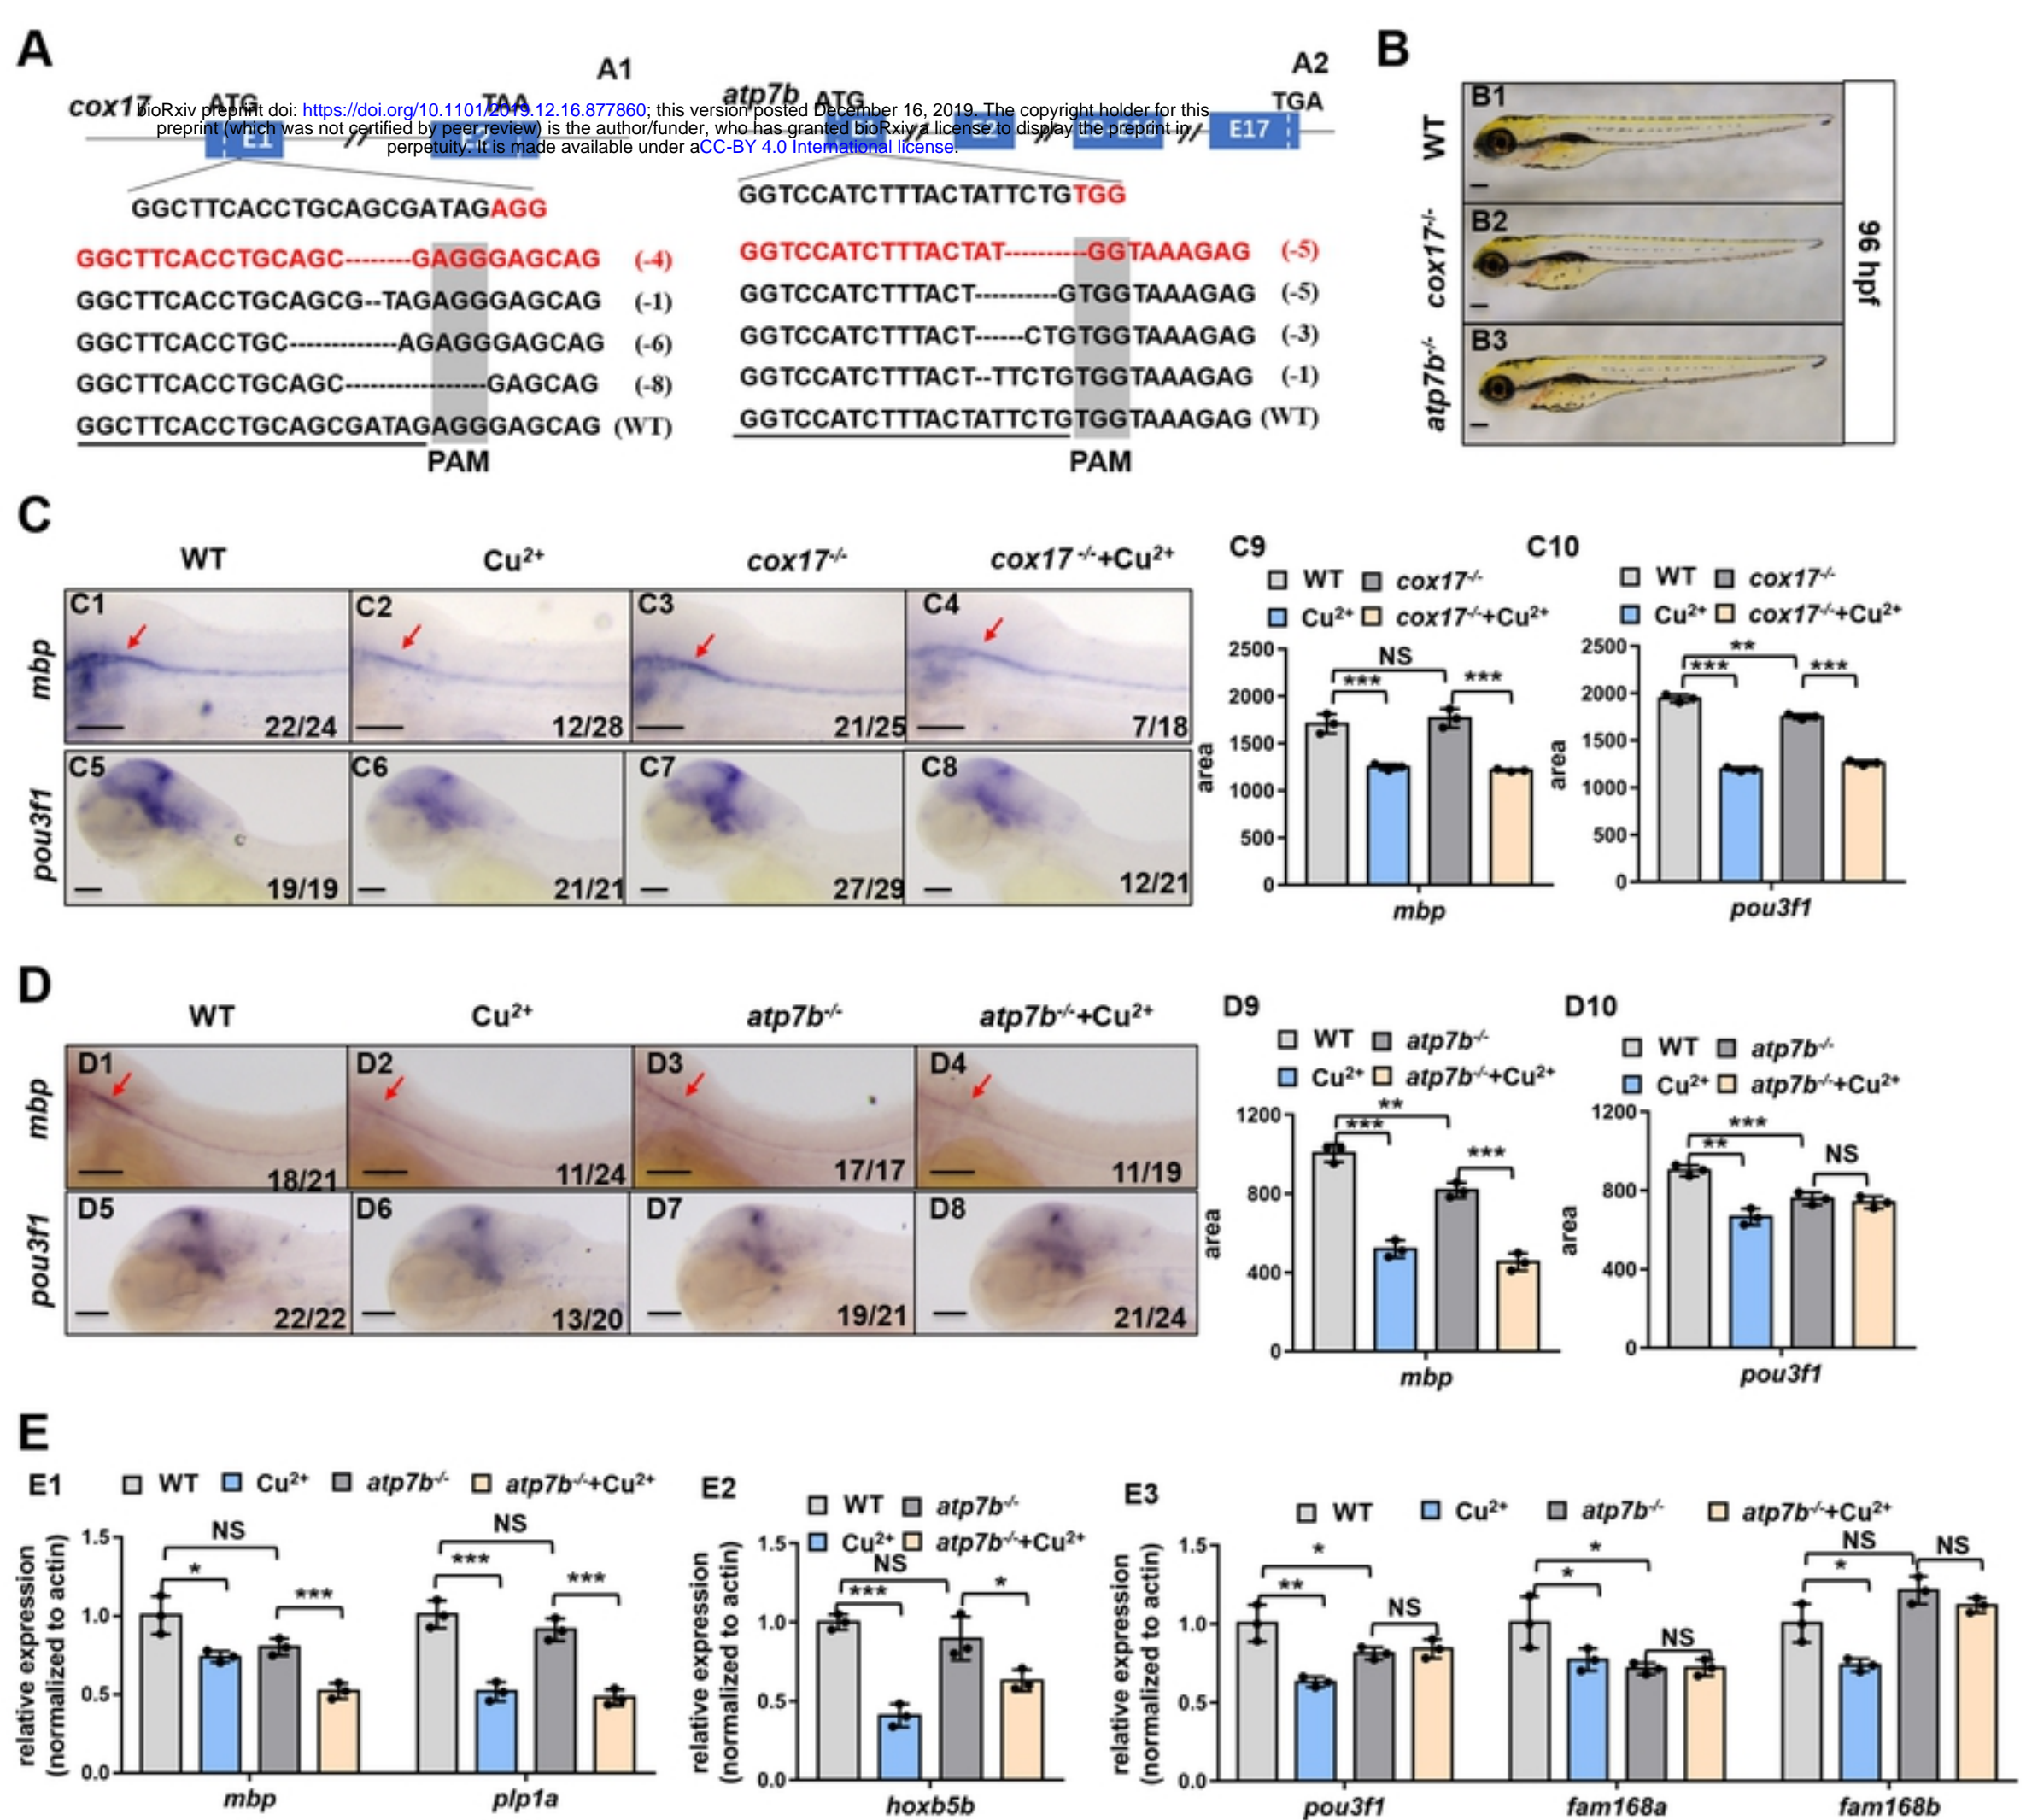

Fig7



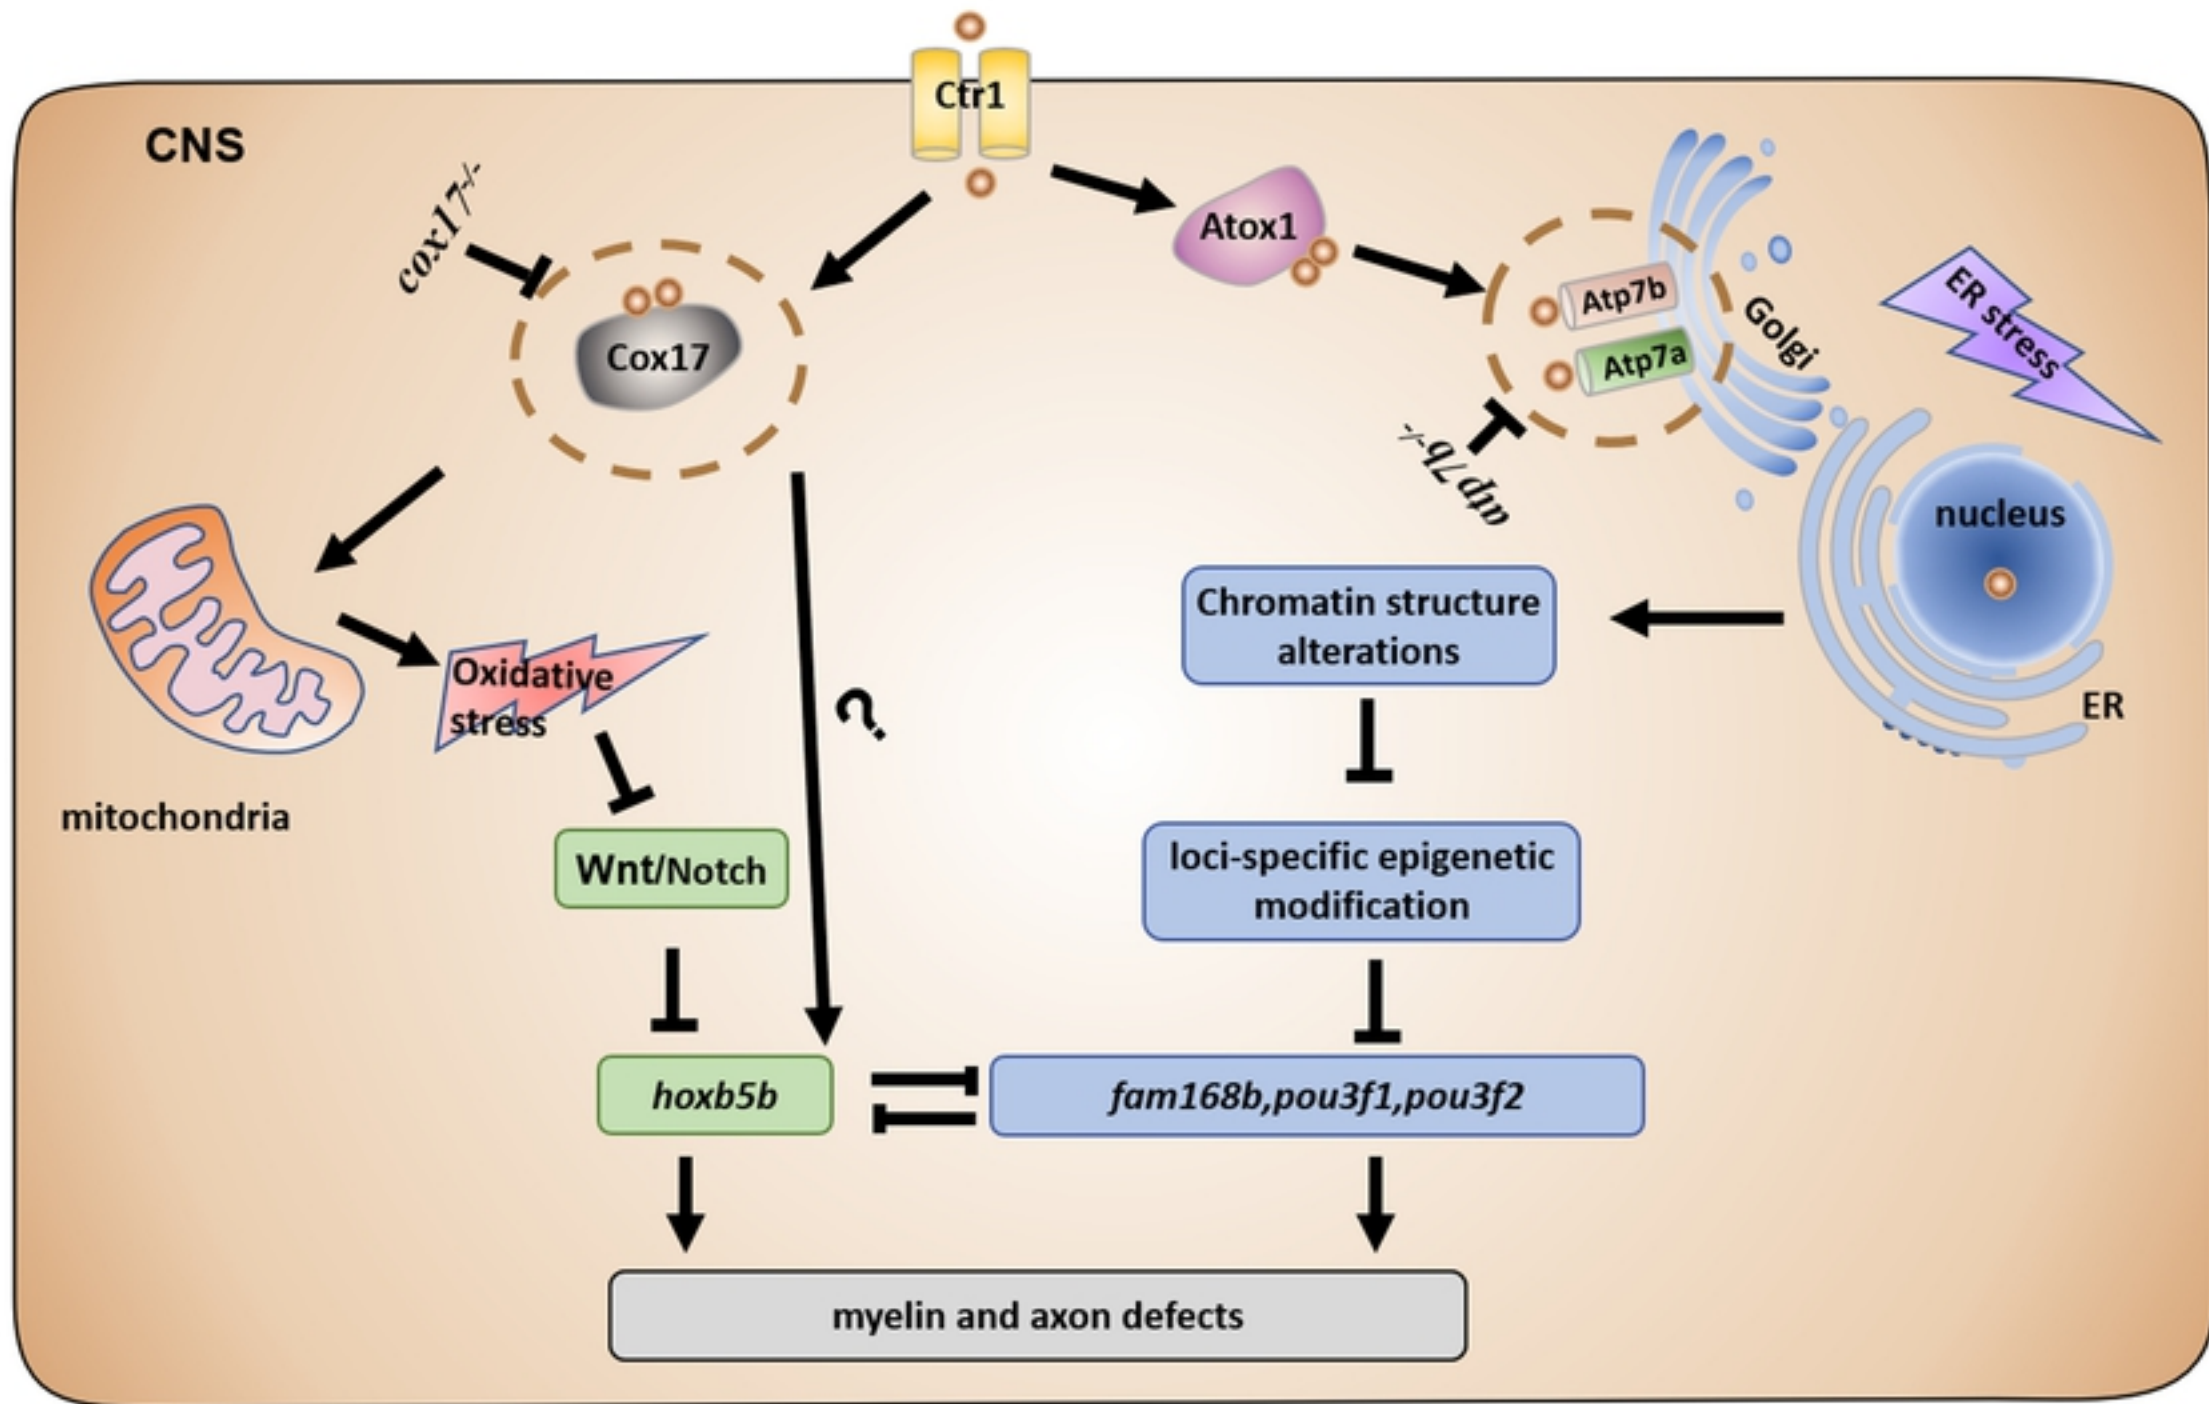

Fig8
